# Supplementary material for: Cichorins D–F: Three New Compounds from Cichorium intybus and Their Biological Effects
Source: PubMed Central journal article supplement (PMC7570803; doi:10.3390/molecules25184160), 2020-09-11
Supplement: molecules-25-04160-s001.pdf [file molecules-25-04160-s001.pdf]

## Supplementary Information

# Cichorins D-F: Three new compounds from *Cichorium intybus* and their biological effects

Muhammad Farooq khan<sup>1</sup>, Fahd A. Nasr<sup>2</sup>, Omar M. Noman<sup>2</sup>, Nouf Abdulaziz Alyhya<sup>1</sup>, Iftikhar Ali<sup>3,4</sup>, Mohamad Saoud<sup>5</sup>, Robert Rennert<sup>5</sup>, Mthandazo Dube<sup>5</sup>, Wahid Hussain<sup>6</sup>, Ivan R. Green<sup>7</sup>, Omer Ahmed M. Basudan<sup>8</sup>, Riaz Ullah<sup>2</sup>, Shamsa Hilal Anazi<sup>1</sup>, and Hidayat Hussain<sup>\*5</sup>

<sup>1.</sup> Department of Zoology, College of Science, King Saud University, P.O. Box 2455, Riyadh 11451, Saudi Arabia; [fmhammad@ksu.edu.sa](mailto:fmhammad@ksu.edu.sa); [437203455@ksu.edu.sa](mailto:437203455@ksu.edu.sa); [439204364@student.ksu.edu.sa](mailto:439204364@student.ksu.edu.sa)

<sup>2.</sup> Medicinal, Aromatic and Poisonous Plants Research Center, College of Pharmacy, King Saud University, Riyadh 11451, Saudi Arabia; [fnasr@ksu.edu.sa](mailto:fnasr@ksu.edu.sa); [onoman@ksu.edu.sa](mailto:onoman@ksu.edu.sa); [rullah@ksu.edu.sa](mailto:rullah@ksu.edu.sa)

<sup>3.</sup> Shandong Analysis and Test Center, Qilu University of Technology (Shandong Academy of Sciences), Jinan 250014, China; [iftikharpcr@yahoo.com](mailto:iftikharpcr@yahoo.com)

<sup>4.</sup> Department of Chemistry, Karakoram International University, Gilgit 15100, Pakistan

<sup>5.</sup> Department of Bioorganic Chemistry, Leibniz Institute of Plant Biochemistry, Weinberg 3, D-06120 Halle (Salle), Germany; [Mohamad.Saoud@ipb-halle.de](mailto:Mohamad.Saoud@ipb-halle.de); [Robert.Rennert@ipb-halle.de](mailto:Robert.Rennert@ipb-halle.de); [Mthandazo.Dube@ipb-halle.de](mailto:Mthandazo.Dube@ipb-halle.de)

<sup>6.</sup> Department of Botany, Government Post Graduate College Parachinar 26300, District Kurram, Pakistan; [wahidhussain@uop.edu.pk](mailto:wahidhussain@uop.edu.pk)

<sup>7.</sup> Department of Chemistry and Polymer Science, University of Stellenbosch, Private Bag X1, Matieland, Stellenbosch 7600, South Africa; [irg@sun.ac.za](mailto:irg@sun.ac.za)

<sup>8.</sup> Department of Pharmacognosy, College of Pharmacy, King Saud University, P.O. Box 2455, Riyadh 11451, Saudi Arabia; [basudan@ksu.edu.sa](mailto:basudan@ksu.edu.sa)

\* Correspondence: [hussainchem3@gmail.com](mailto:hussainchem3@gmail.com)/[Hidayat.Hussain@ipb-halle.de](mailto:Hidayat.Hussain@ipb-halle.de) (H.H.);  [orcid.org/0000-0002-8654-8127](https://orcid.org/0000-0002-8654-8127)

## Contents

**Page S2: Figure S1.** Cell viability of tested cell lines determined by crystal violet (CV) assay.

**Page S3: Figure S2.** <sup>1</sup>H NMR spectrum of cichorin D (1) (400 MHz, CDCl<sub>3</sub>).

**Page S4: Figure S3.** <sup>13</sup>C NMR spectrum of cichorin D (1) (400 MHz, CDCl<sub>3</sub>).

**Page S5: Figure S4.** DEPT spectrum of cichorin D (1) (400 MHz, CDCl<sub>3</sub>).

**Page S6: Figure S5.** COSY spectrum of cichorin D (1) (400 MHz, CDCl<sub>3</sub>).

**Page S7: Figure S6.** HSQC spectrum of cichorin D (1) (400 MHz, CDCl<sub>3</sub>).

**Page S8: Figure S7.** HMBC spectrum of cichorin D (1) (400 MHz, CDCl<sub>3</sub>).

**Page S9: Figure S8.** ESIMS spectrum of cichorin D (1).

**Page S10: Figure S9.** HRESIMS spectrum of cichorin D (1).

**Page S11: Figure S10.** <sup>1</sup>H NMR spectrum of cichorin E (2) (400 MHz, CDCl<sub>3</sub>).

**Page S12: Figure S11.** <sup>13</sup>C NMR spectrum of cichorin E (2) (400 MHz, CDCl<sub>3</sub>).

**Page S13: Figure S12.** COSY spectrum of cichorin E (2) (400 MHz, CDCl<sub>3</sub>).

Page S14: Figure S13. HSQC spectrum of cichorin E (**2**) (400 MHz, CDCl<sub>3</sub>).

Page S15: Figure S14. HSQC spectrum of cichorin E (**2**) (400 MHz, CDCl<sub>3</sub>).

Page S16: Figure S15. ESIMS spectrum of cichorin E (**2**).

Page S17: Figure S16. HRESIMS spectrum of cichorin E (**2**).

Page S18: Figure S17. <sup>1</sup>H NMR spectrum of cichorin F (**3**) (400 MHz, CDCl<sub>3</sub>).

Page S19: Figure S18. <sup>13</sup>C NMR spectrum of cichorin F (**3**) (400 MHz, CDCl<sub>3</sub>).

Page S20: Figure S19. DEPT spectrum of cichorin F (**3**) (400 MHz, CDCl<sub>3</sub>).

Page S21: Figure S20. COSY spectrum of cichorin F (**3**) (400 MHz, CDCl<sub>3</sub>).

Page S22: Figure S21. HSQC spectrum of cichorin F (**3**) (400 MHz, CDCl<sub>3</sub>).

Page S23: Figure S22. HMBC spectrum of cichorin F (**3**) (400 MHz, CDCl<sub>3</sub>).

Page S24: Figure S23. ESIMS spectrum of cichorin F (**3**).

Page S25: Figure S24. ESIMS spectrum of cichorin F (**3**).

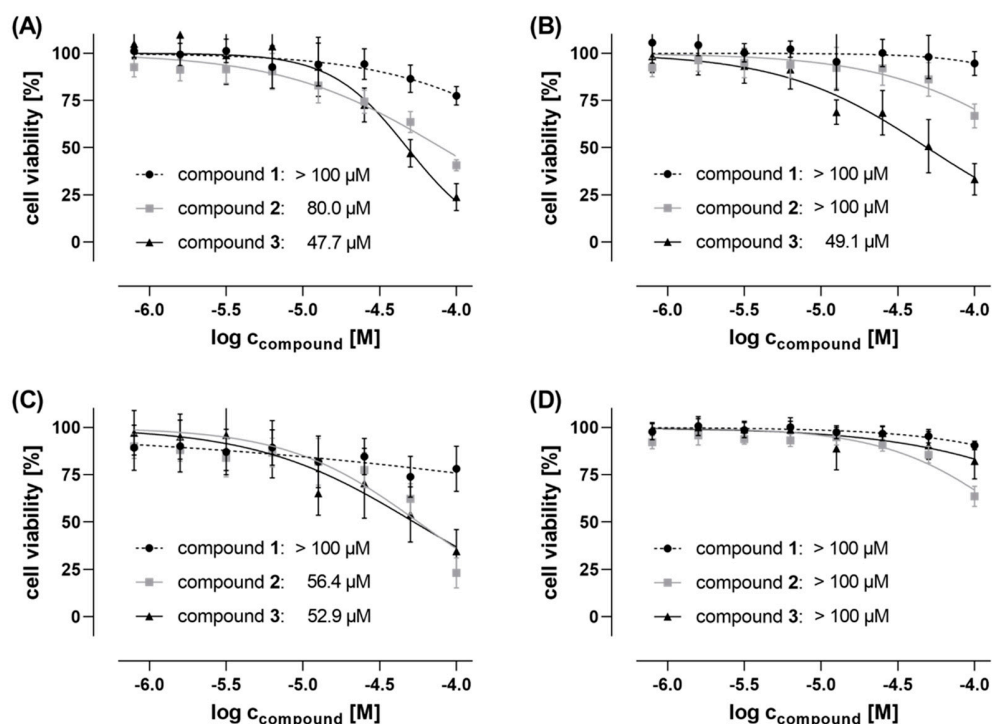

Figure S1. Cell viability of (A) breast cancer MDA-MB-468 cells, (B) breast cancer MDA-MB-231 cells, (C) Ewing's sarcoma SK-N-MC cells, and (D) prostate cancer PC-3 cells treated for 48 h with compounds **1** (●), **2** (■), and **3** (▲), respectively, as determined by crystal violet (CV) assay.

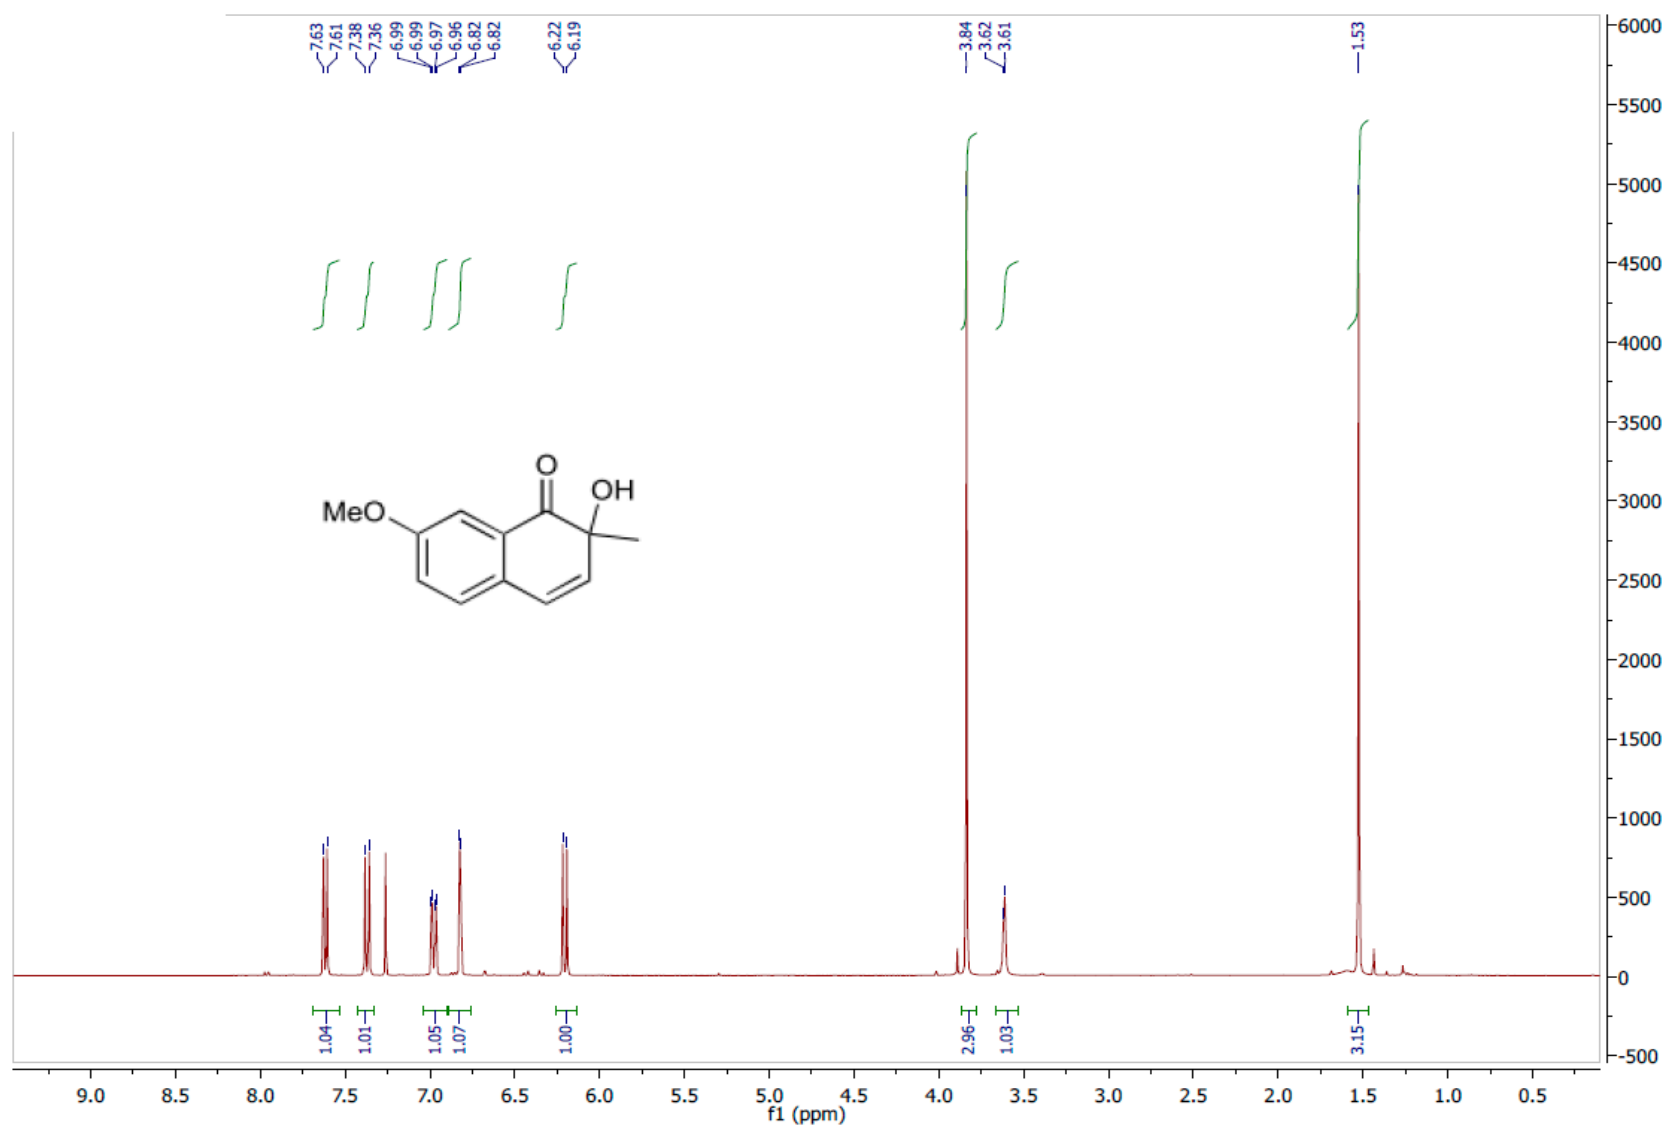

Page S3: Figure S2. <sup>1</sup>H NMR spectrum of cichorin D (1) (400 MHz, CDCl<sub>3</sub>).

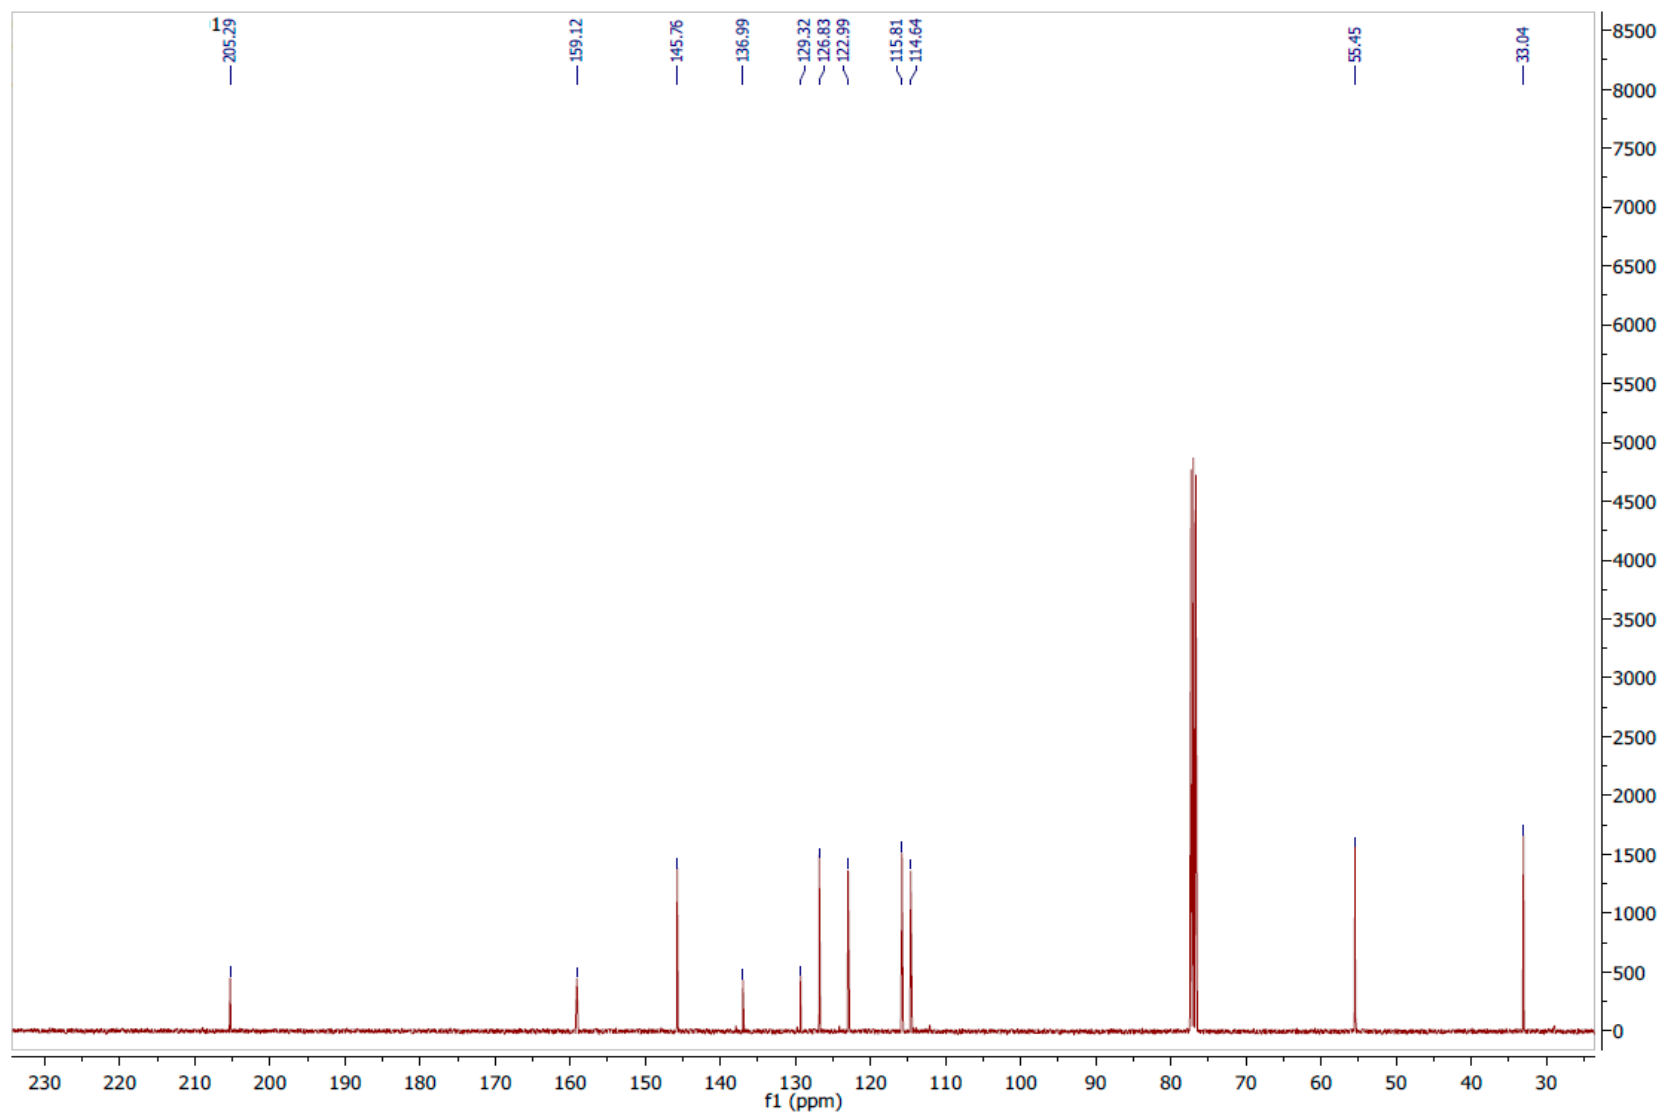

Page S4: Figure S3.  $^{13}\text{C}$  NMR spectrum of cichorin D (1) (400 MHz,  $\text{CDCl}_3$ ).

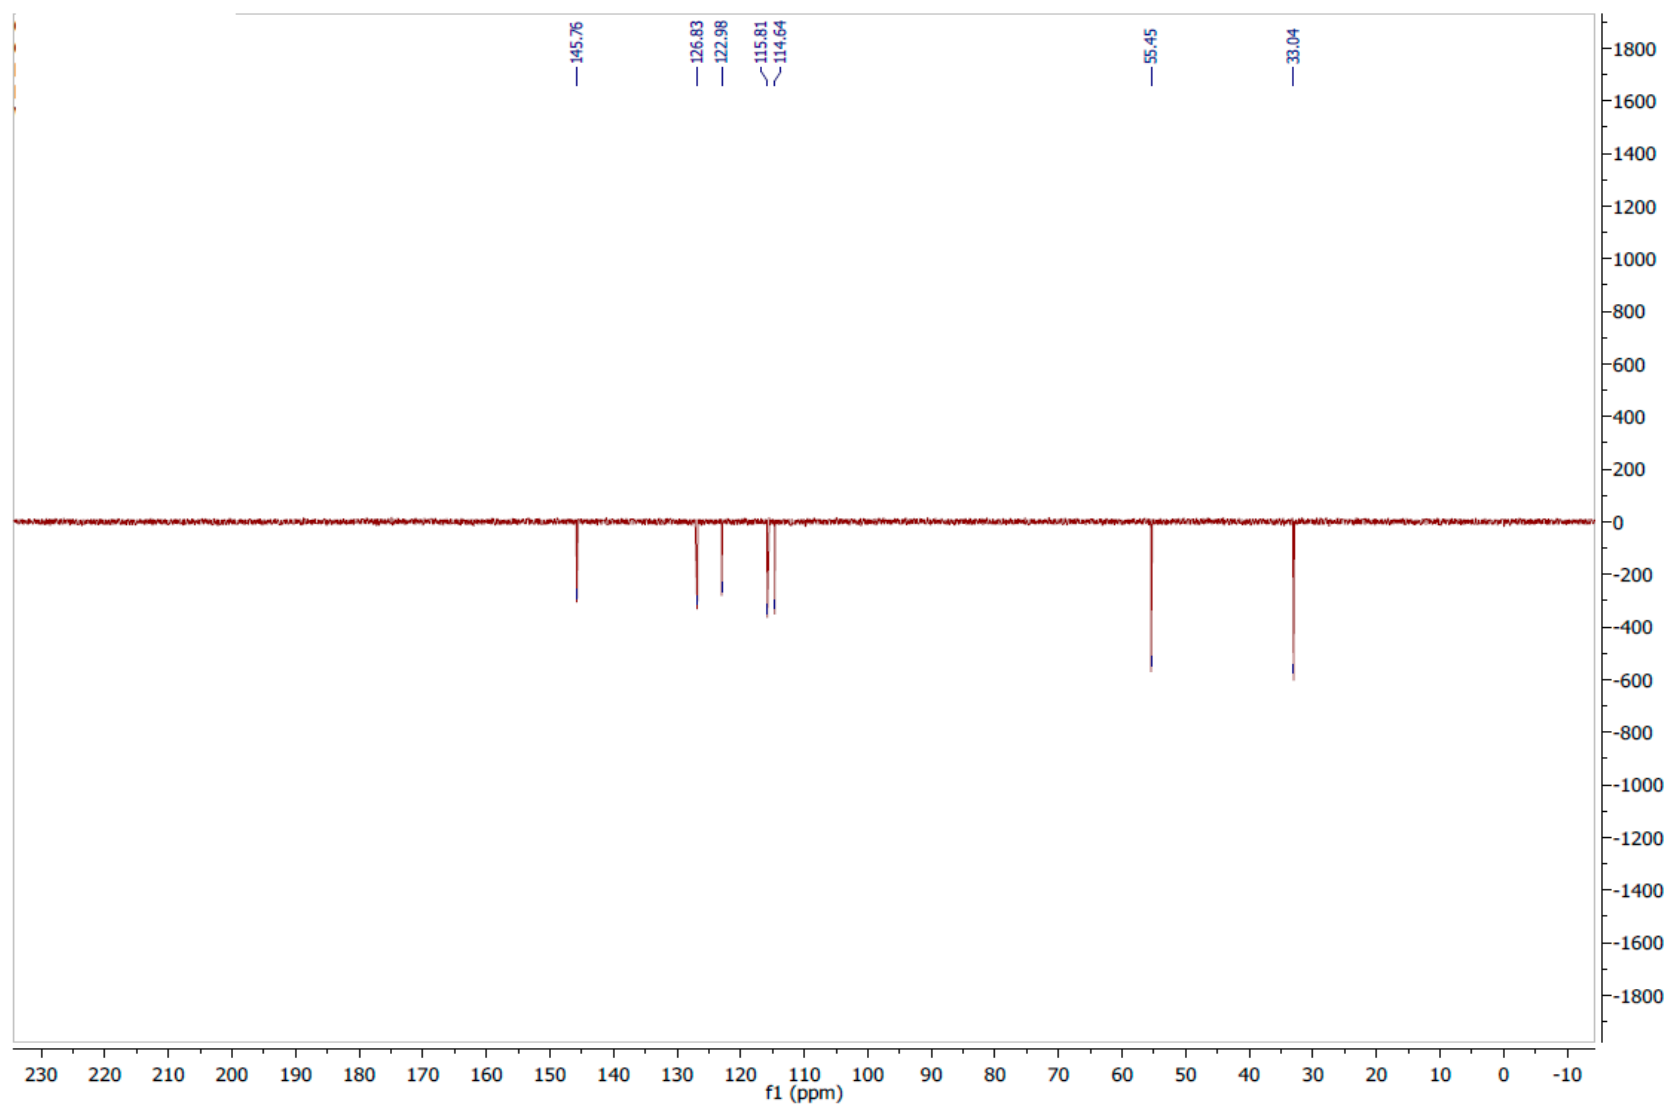

Page S5: Figure S4. DEPT spectrum of cichorin D (1) (400 MHz, CDCl<sub>3</sub>).

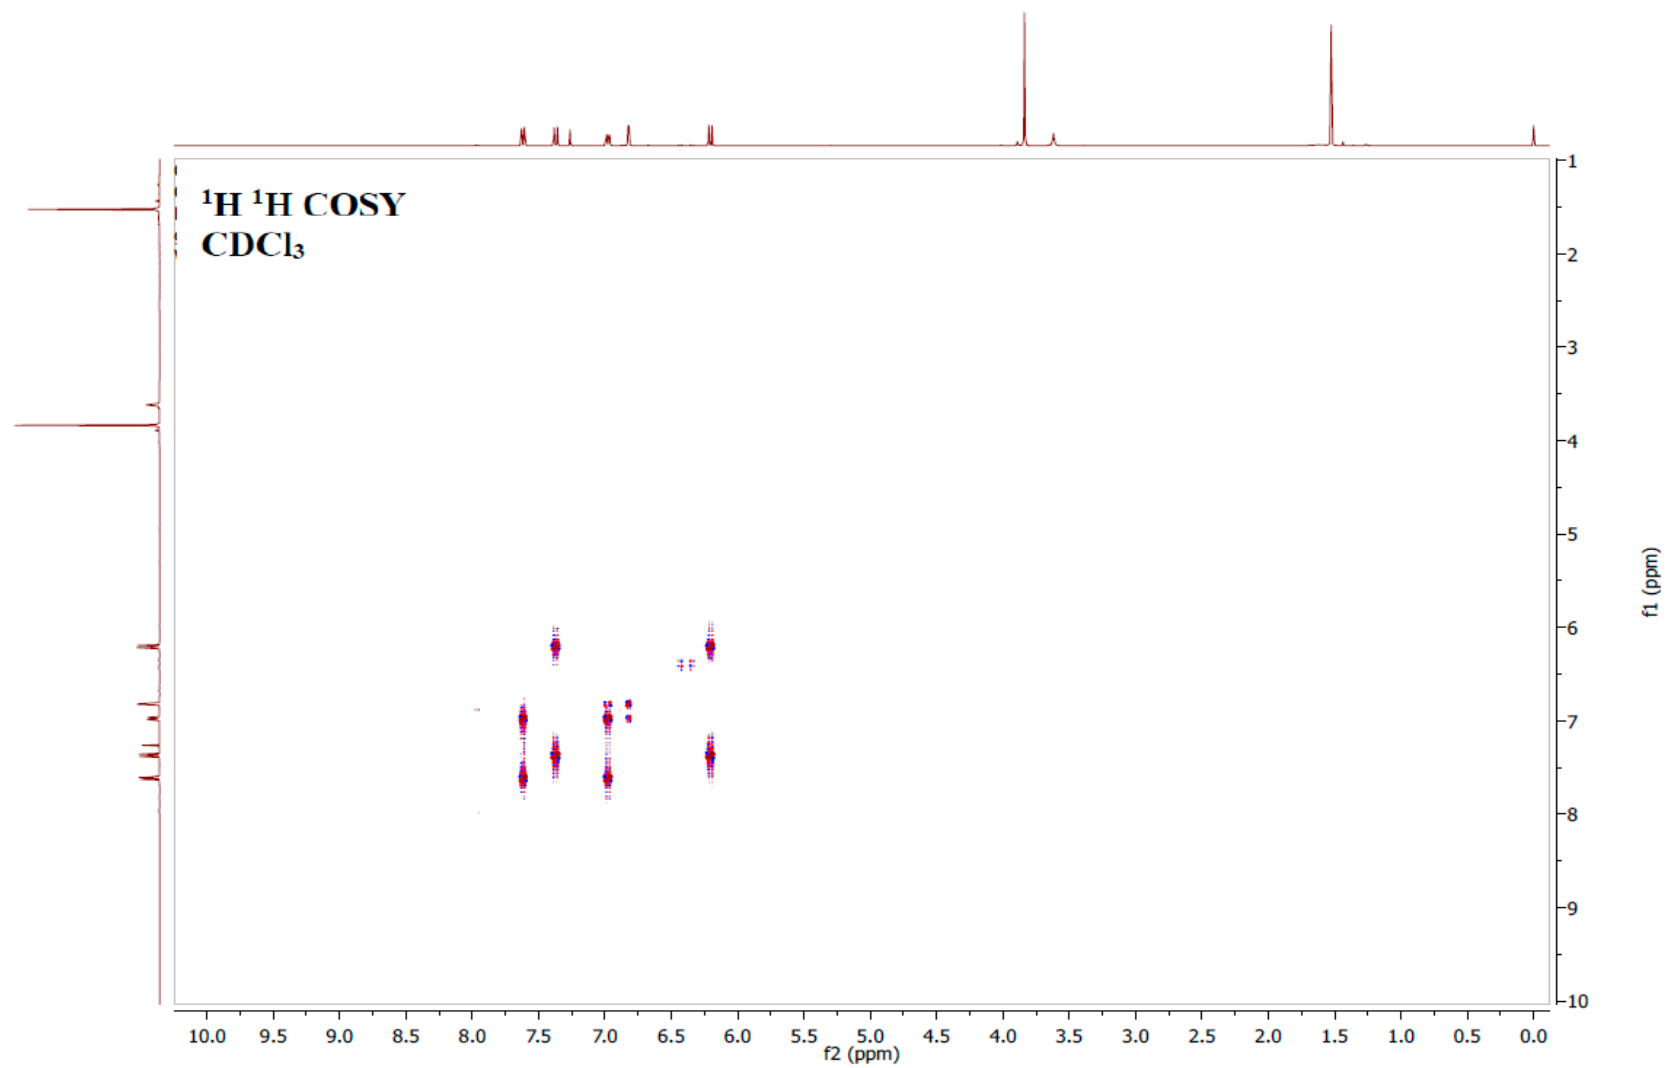

Page S6: Figure S5. COSY spectrum of cichorin D (**1**) (400 MHz, CDCl<sub>3</sub>).

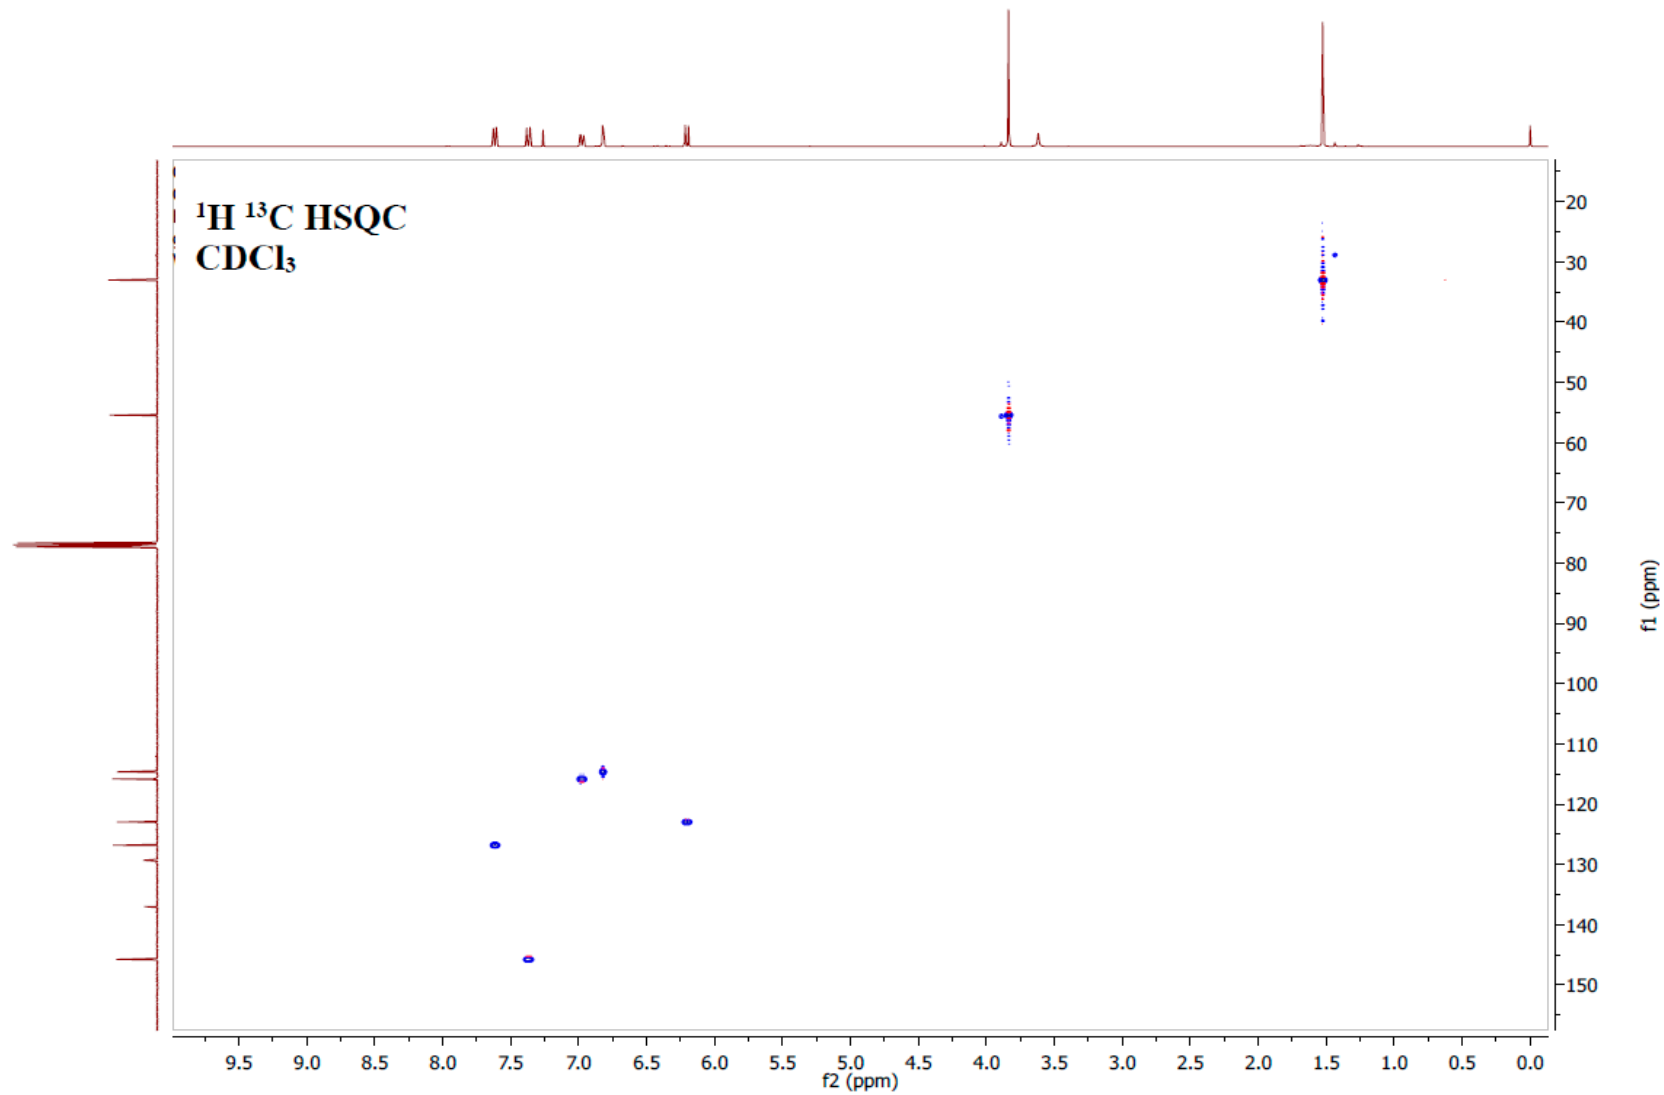

Page S7: Figure S6. HSQC spectrum of cichorin D (**1**) (400 MHz,  $\text{CDCl}_3$ ).

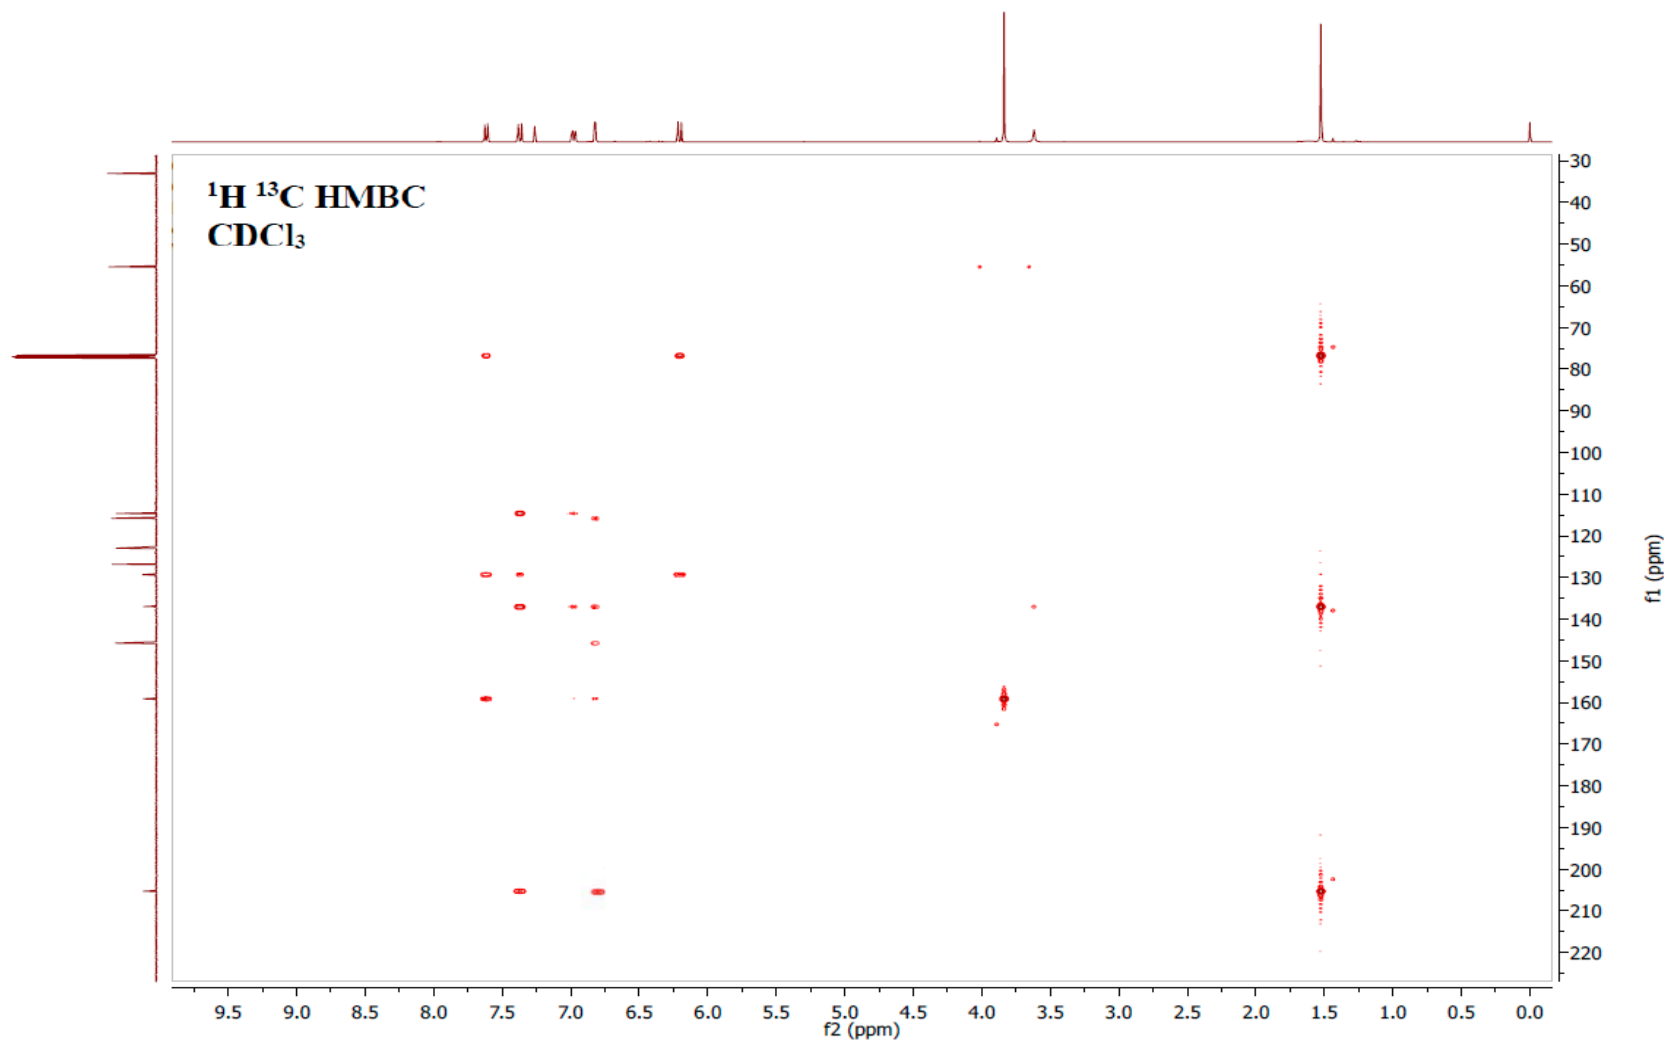

Page S8: Figure S7. HMBC spectrum of cichorin D (**1**) (400 MHz,  $\text{CDCl}_3$ ).



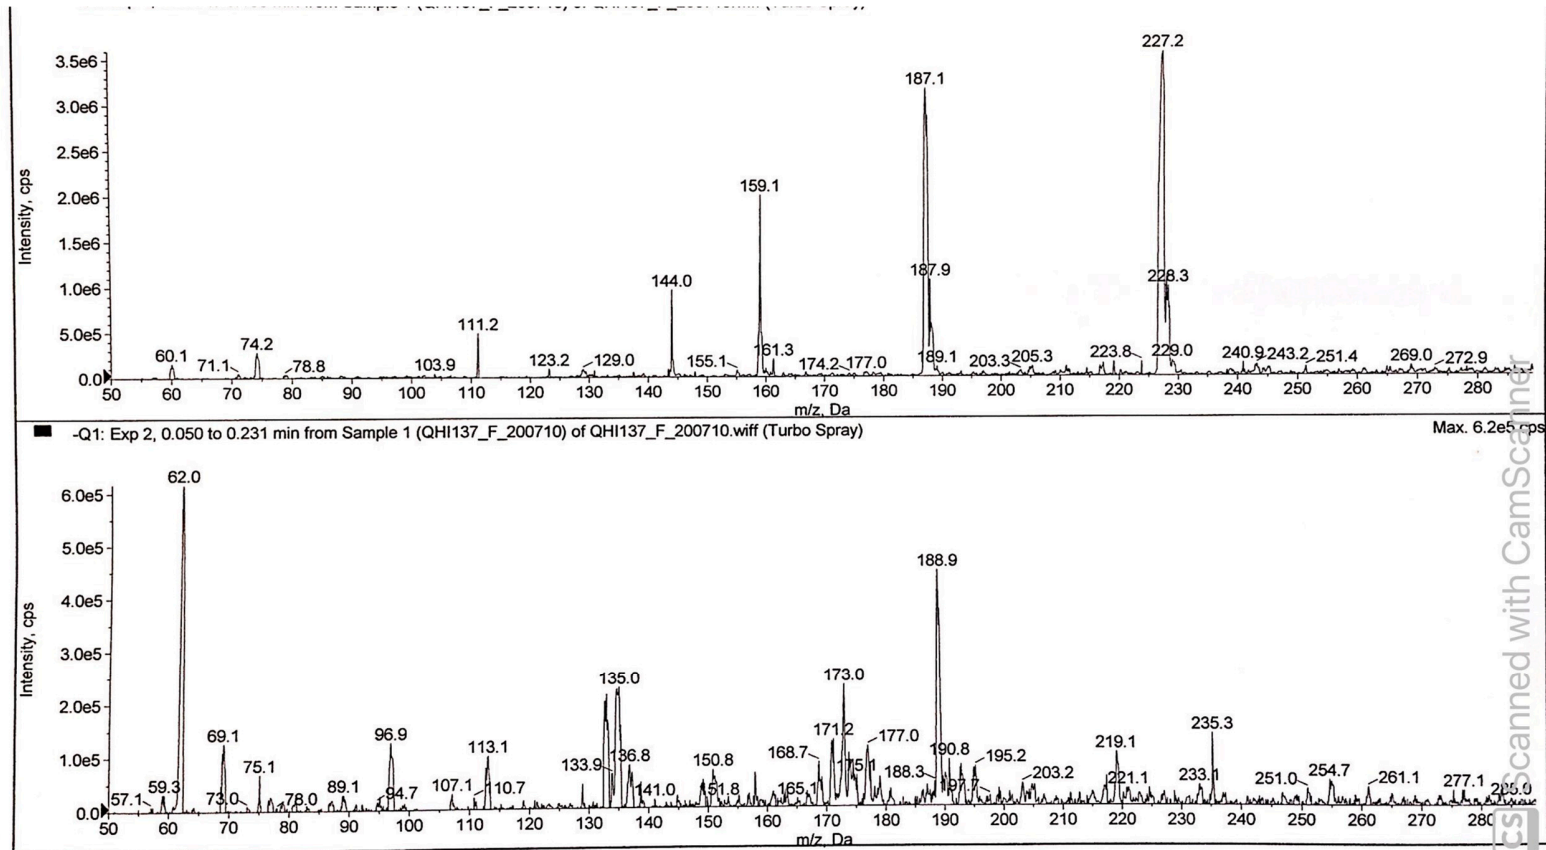

Page S9: Figure S8. ESIMS spectrum of cichorin D (1).

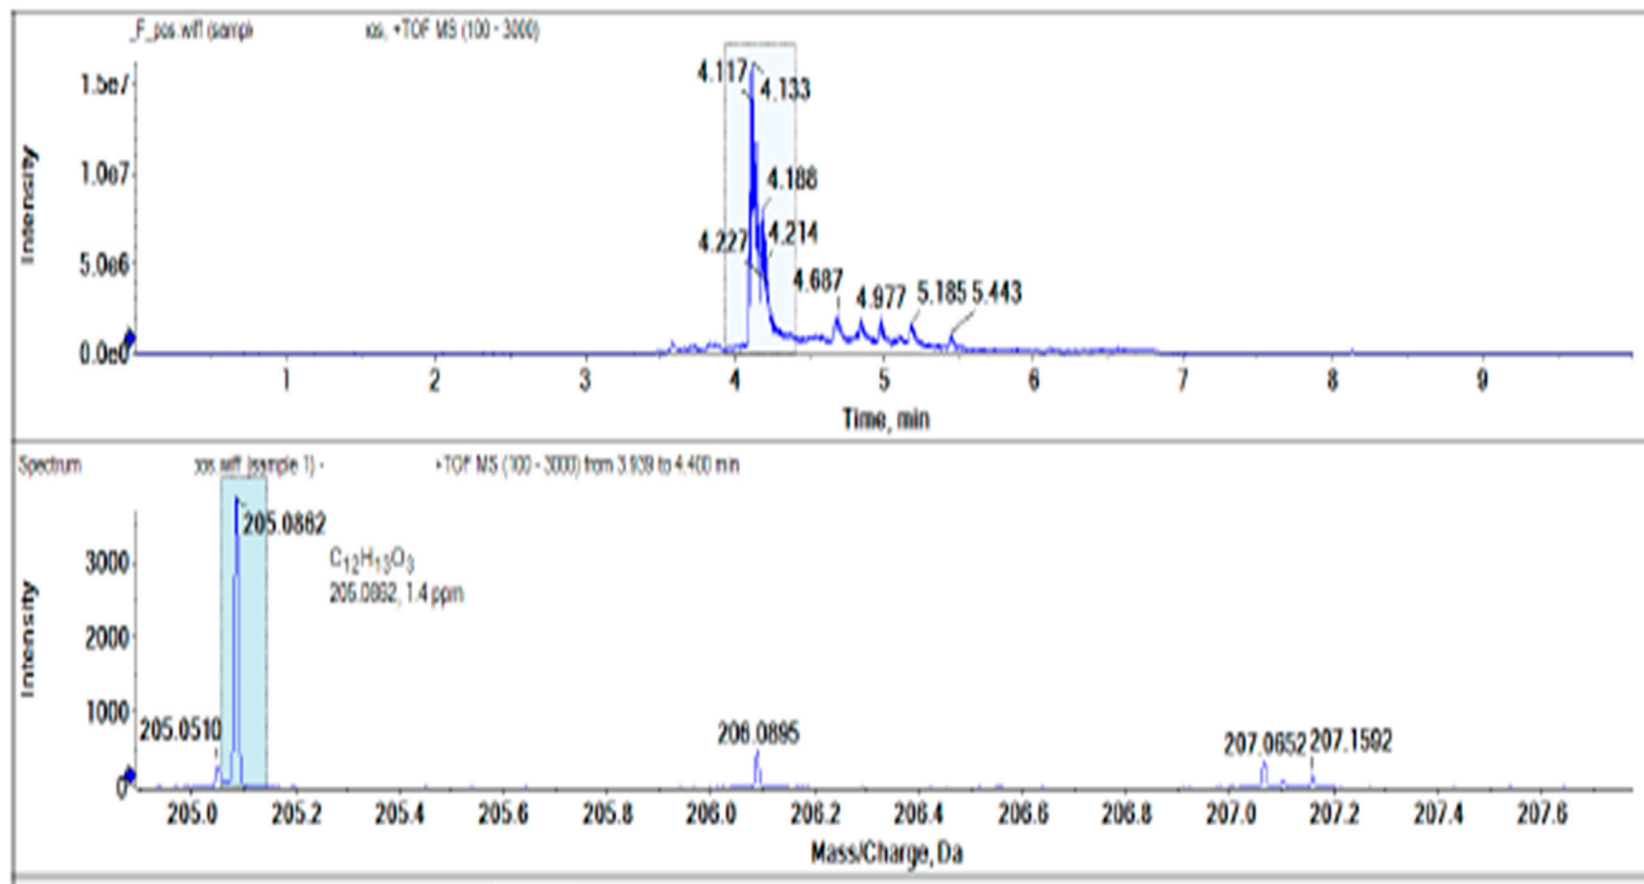

Page S10: Figure S9. HRESIMS spectrum of cichorin D (1).

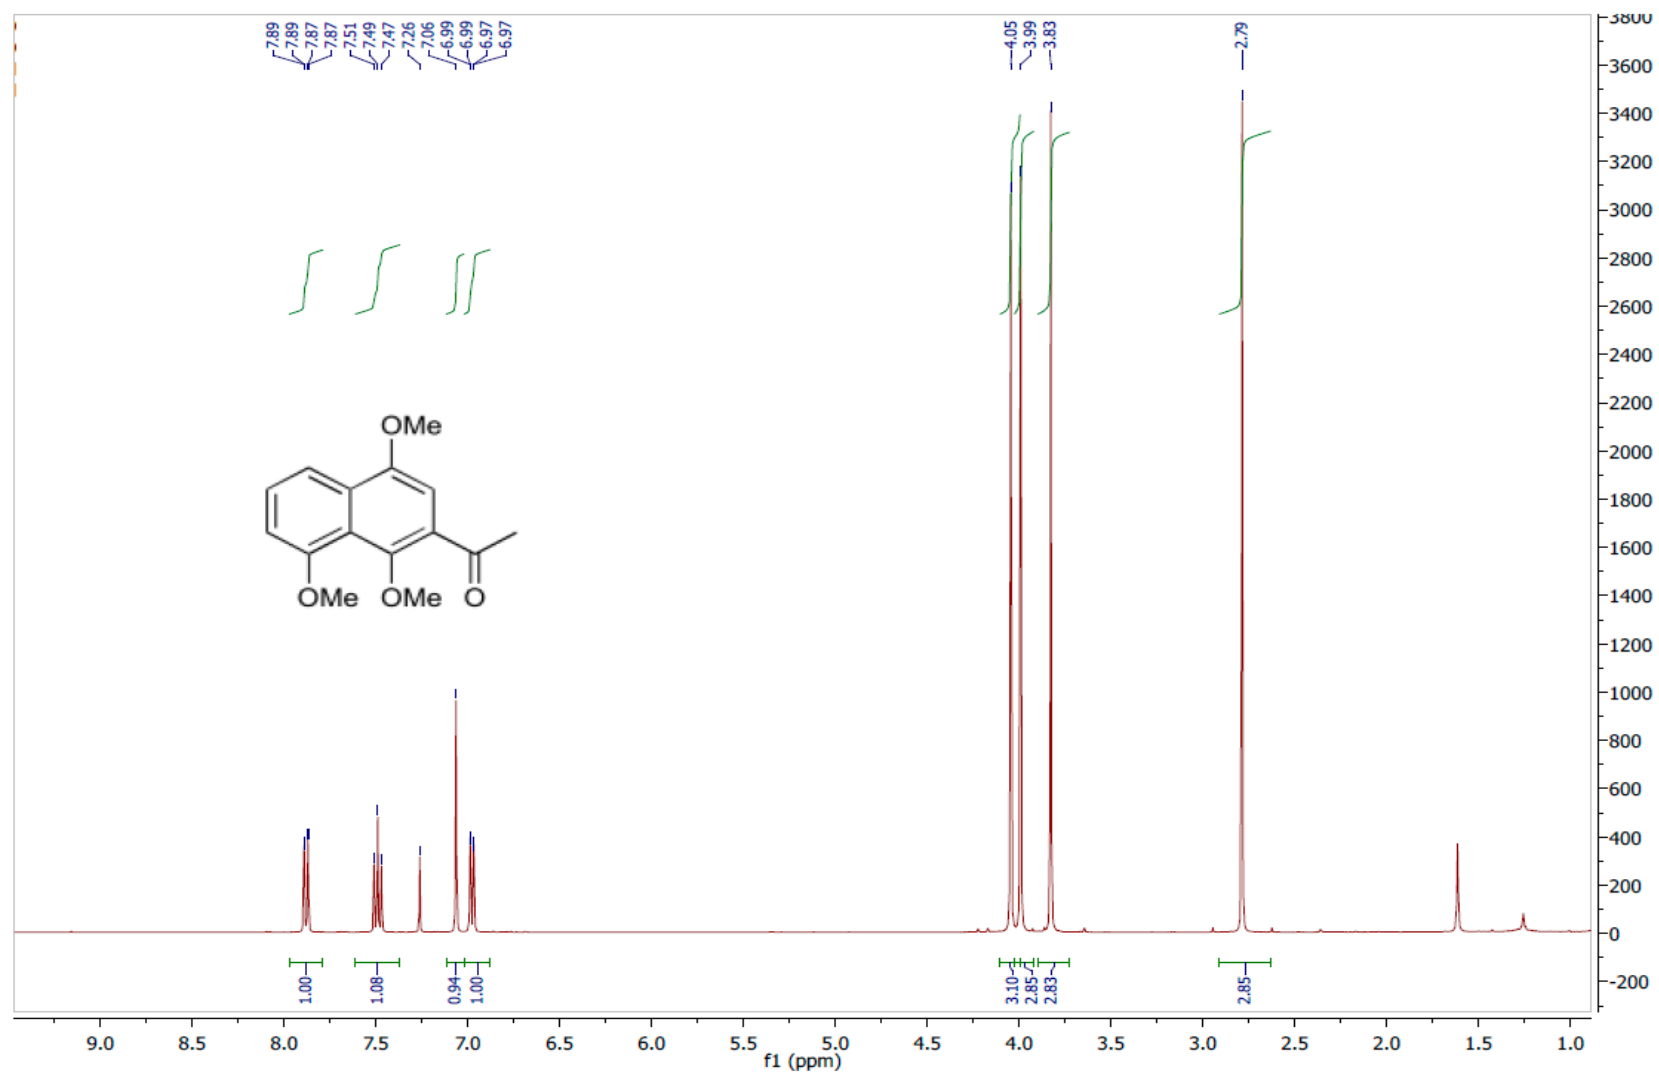

Page S11: Figure S10. <sup>1</sup>H NMR spectrum of cichorin E (2) (400 MHz, CDCl<sub>3</sub>).

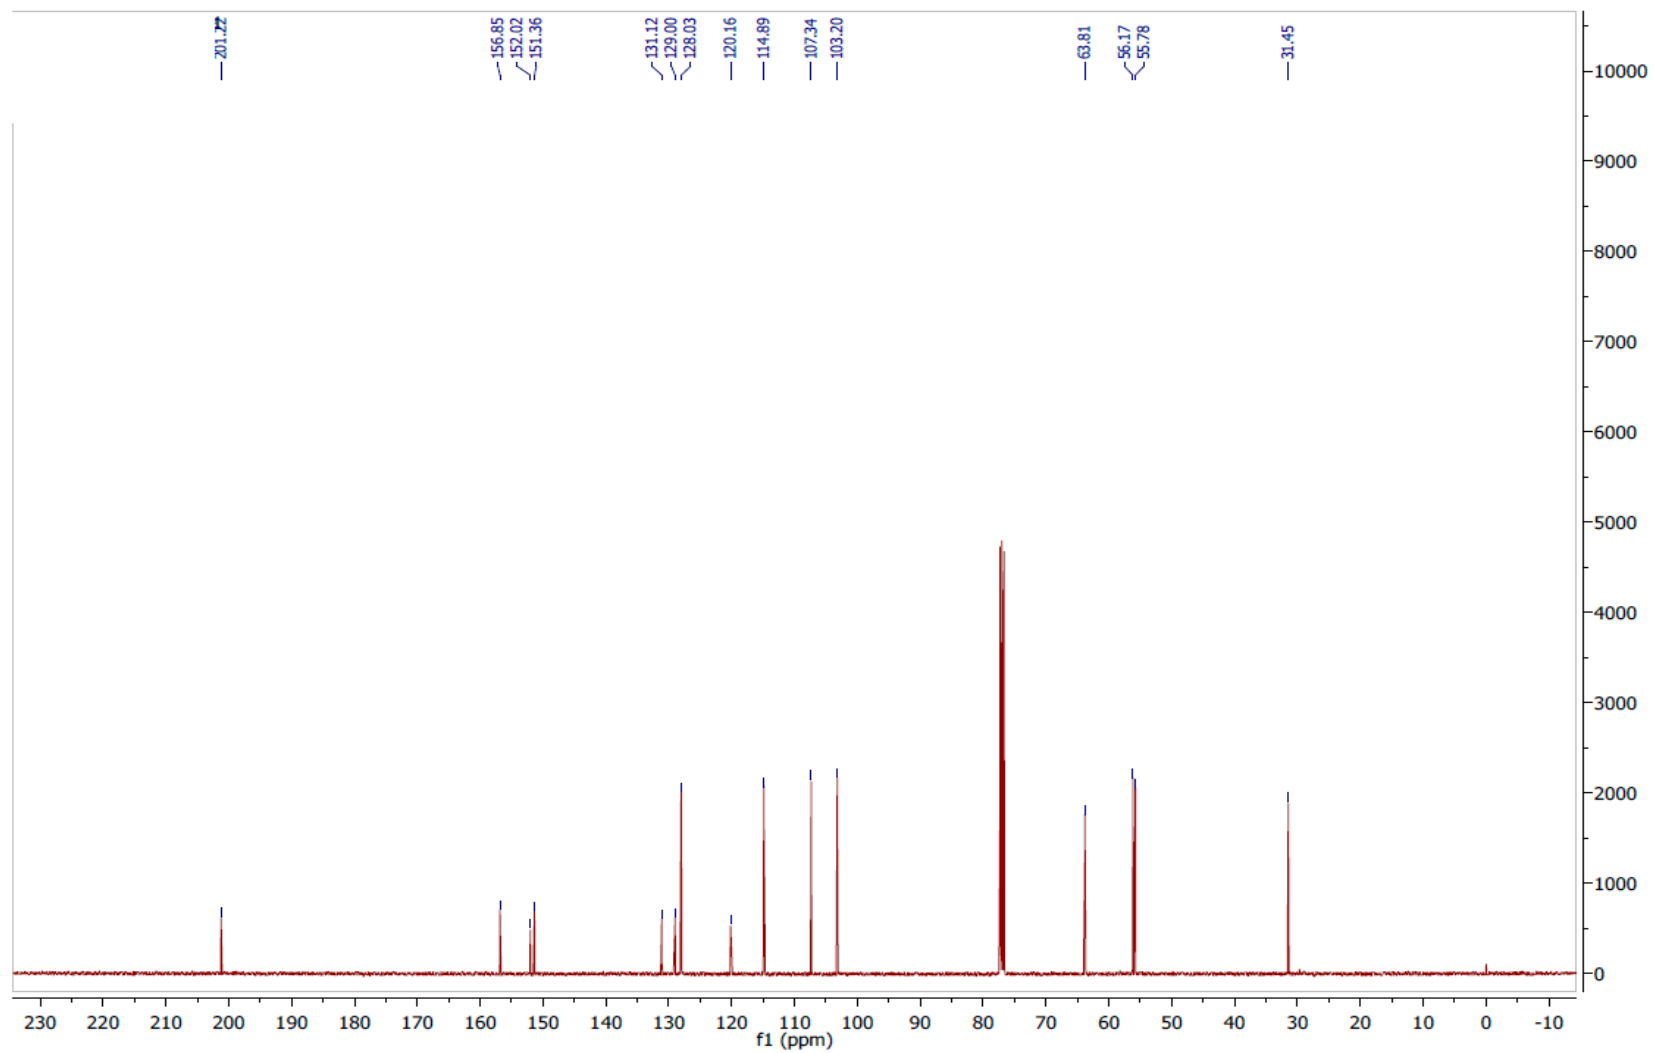

Page S12: Figure S11.  $^{13}\text{C}$  NMR spectrum of cichorin E (2) (400 MHz,  $\text{CDCl}_3$ ).

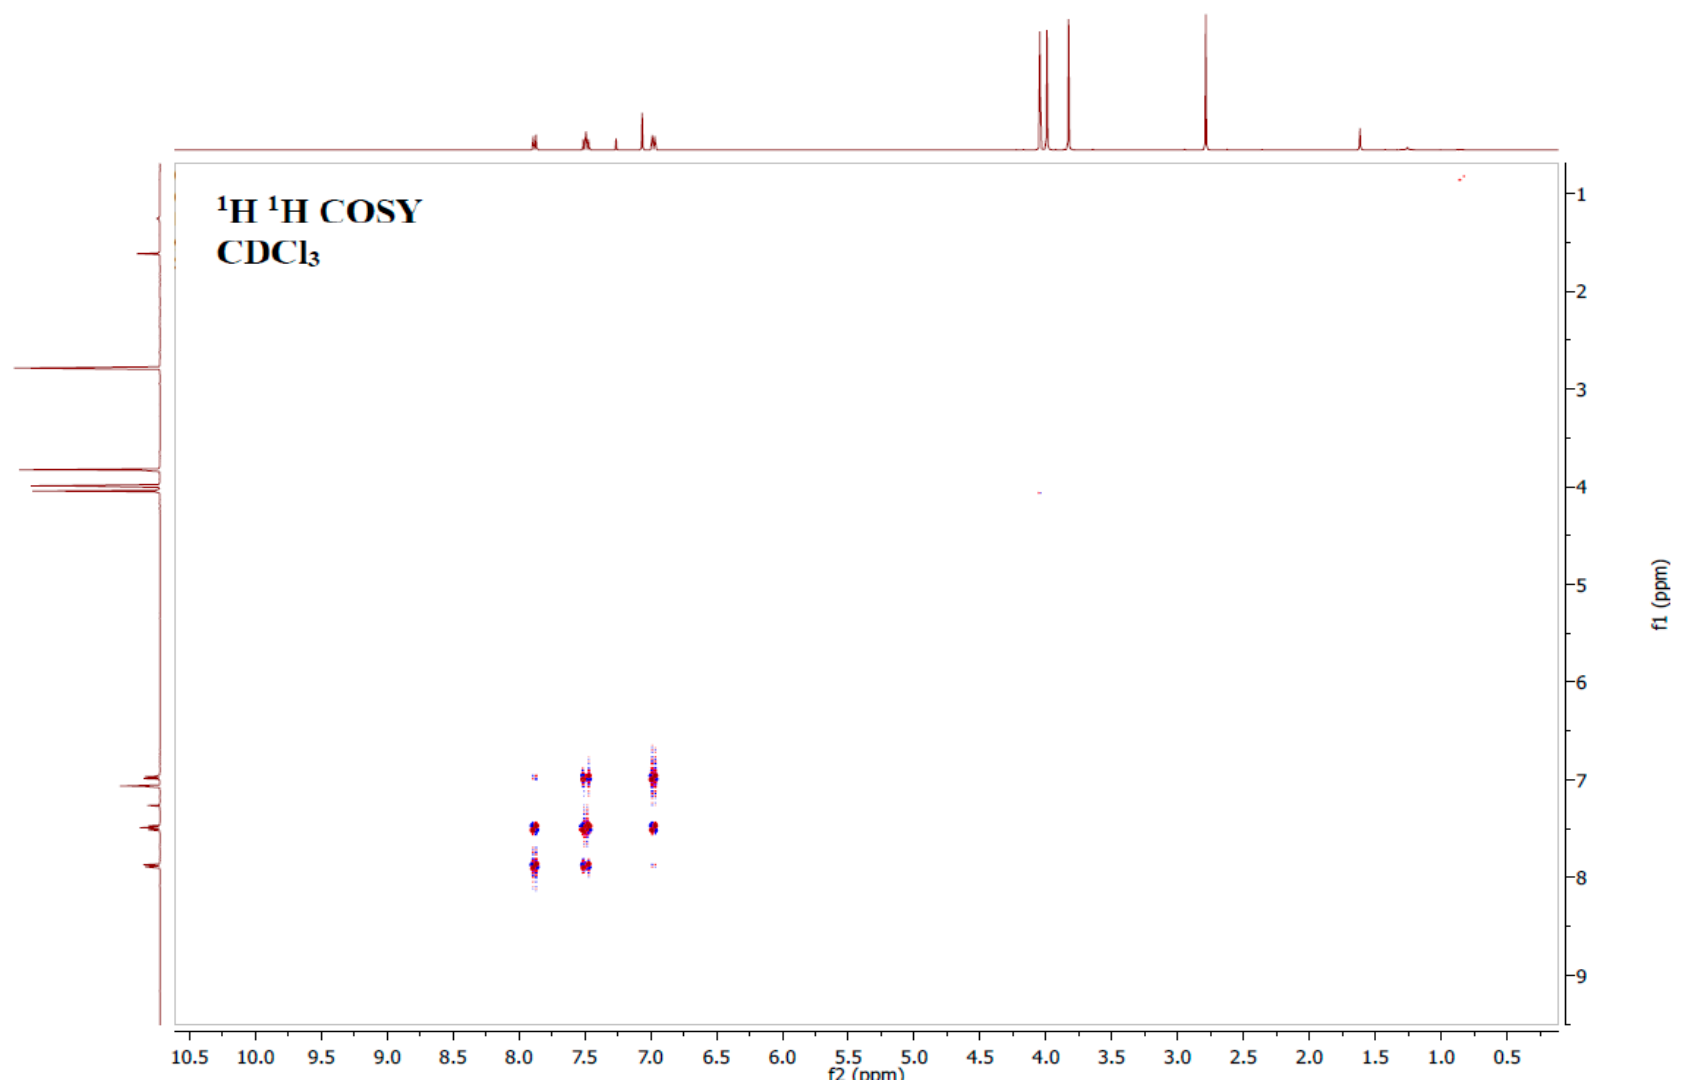

Page S13: Figure S12. COSY spectrum of cichorin E (**2**) (400 MHz,  $\text{CDCl}_3$ ).

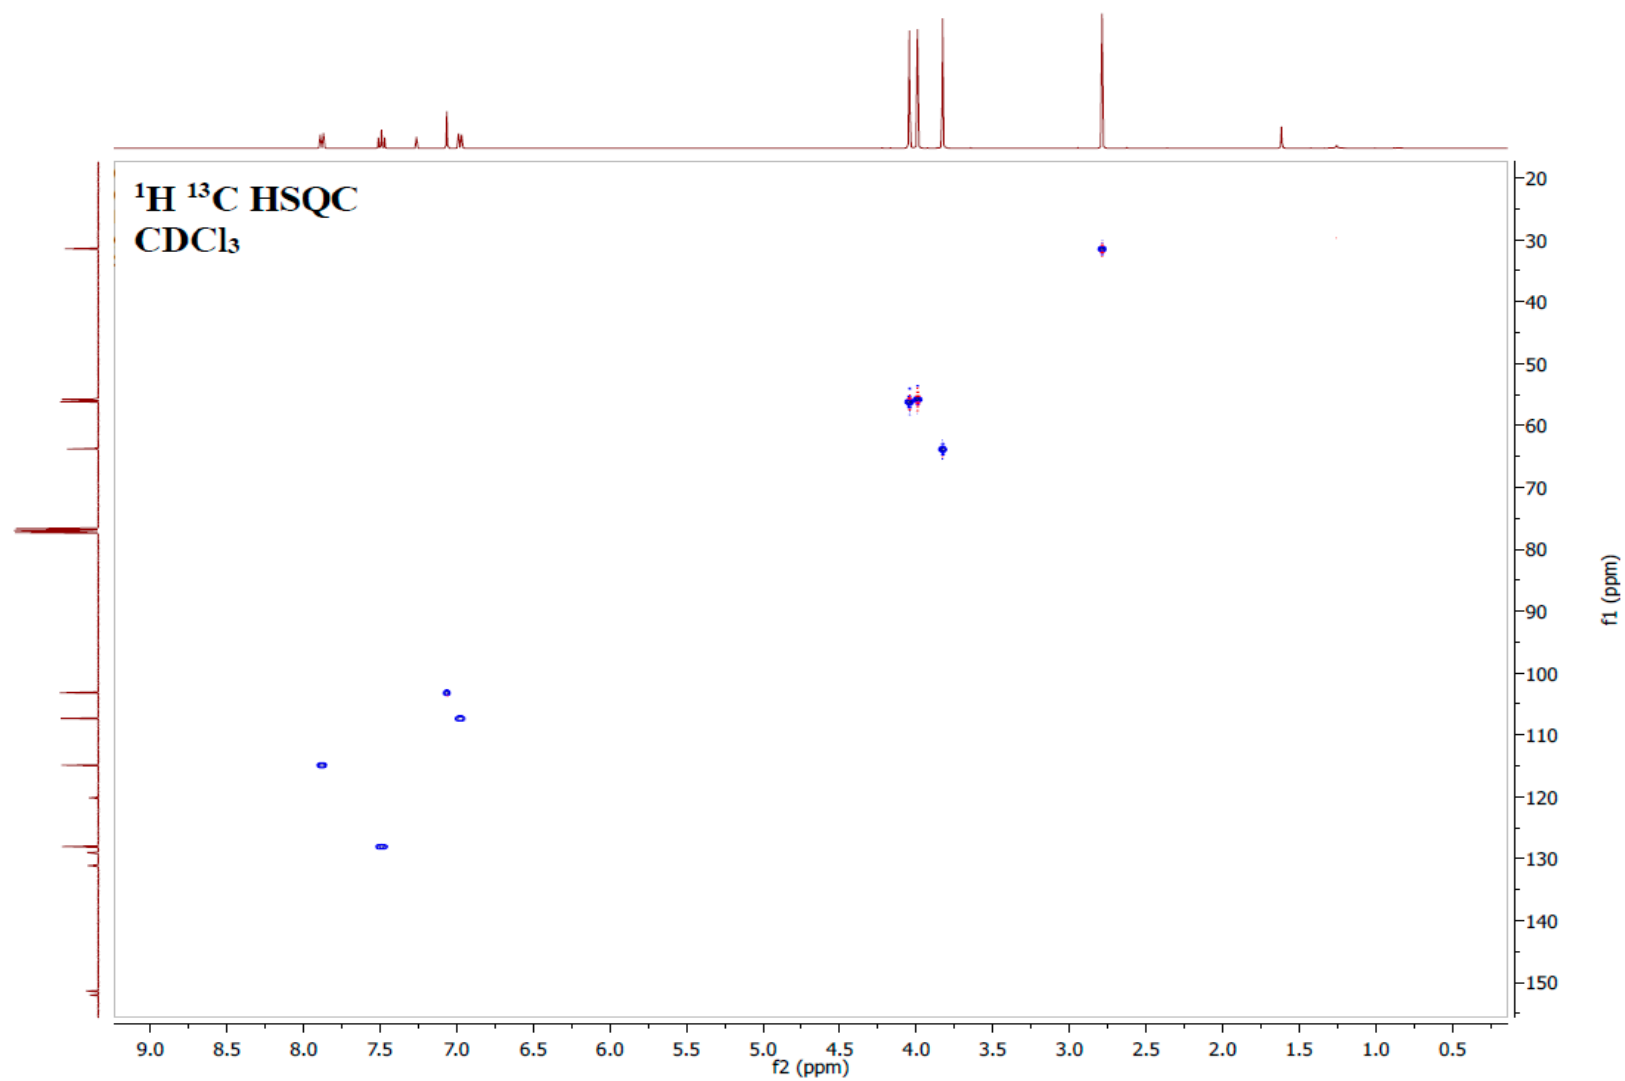

**Page S14: Figure S13.** HSQC spectrum of cichorin E (**2**) (400 MHz,  $\text{CDCl}_3$ ).

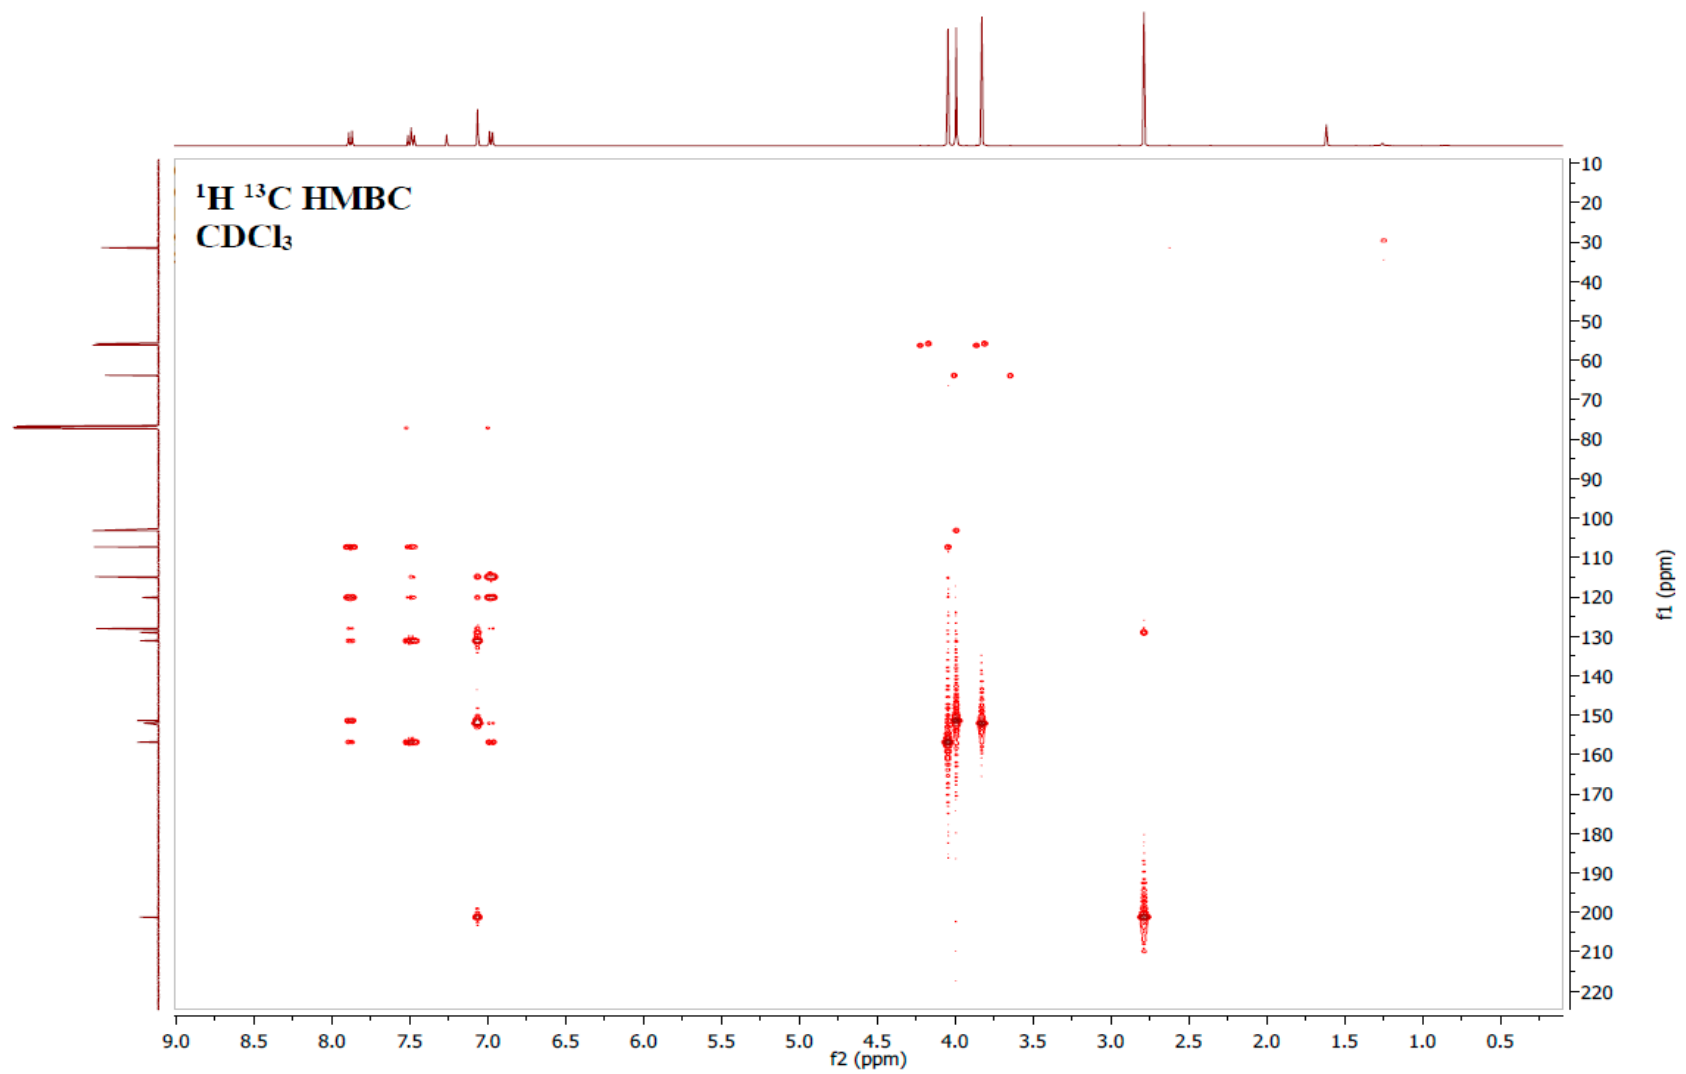

Page S15: Figure S14. HSQC spectrum of cichorin E (**2**) (400 MHz,  $\text{CDCl}_3$ ).

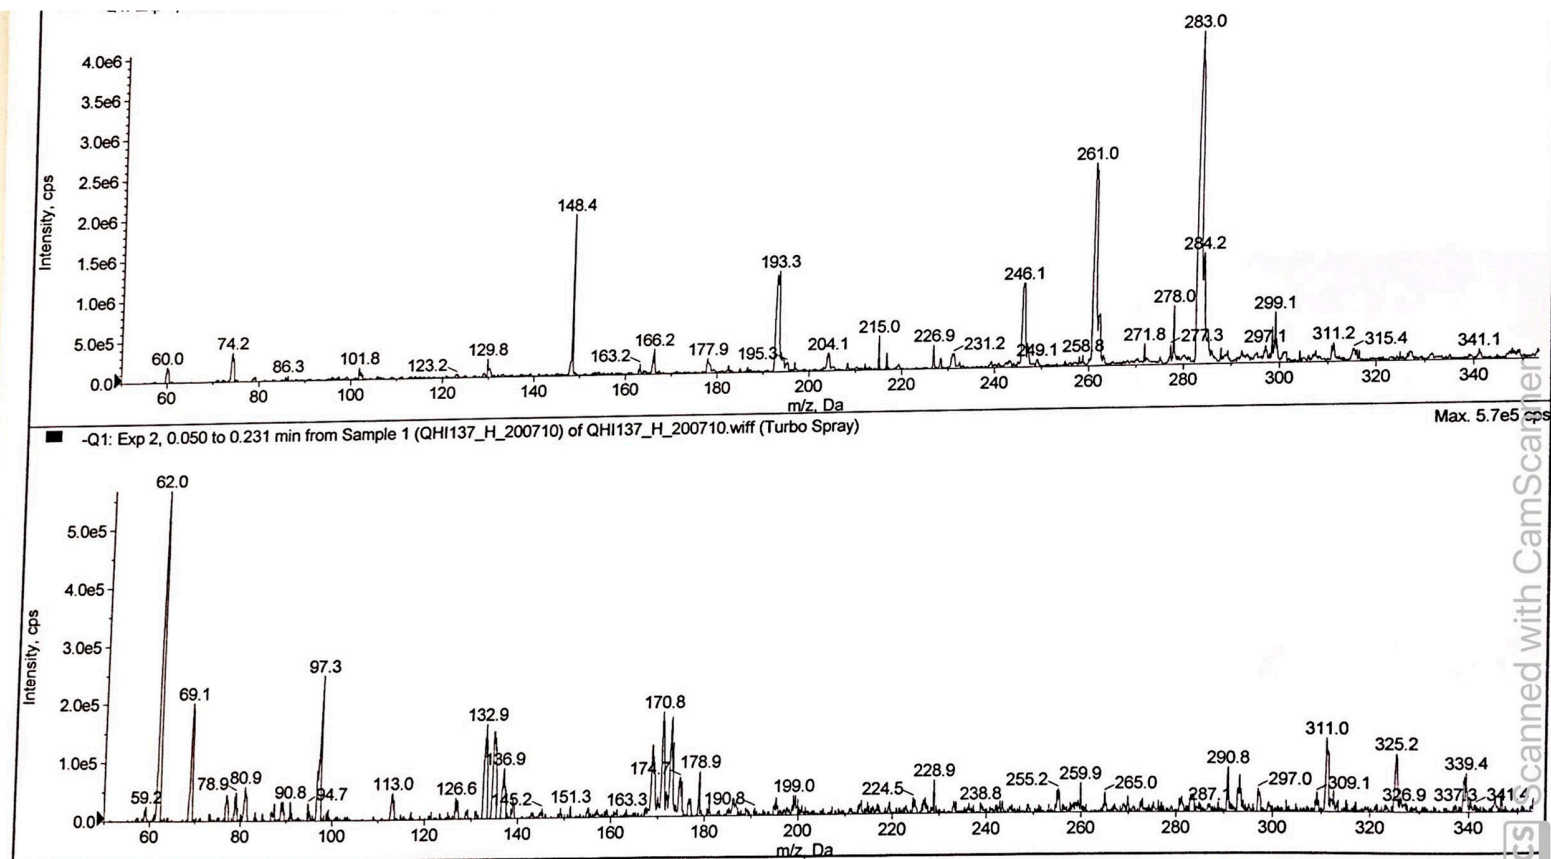

Page S16: Figure S15. ESIMS spectrum of cichorin E (2).



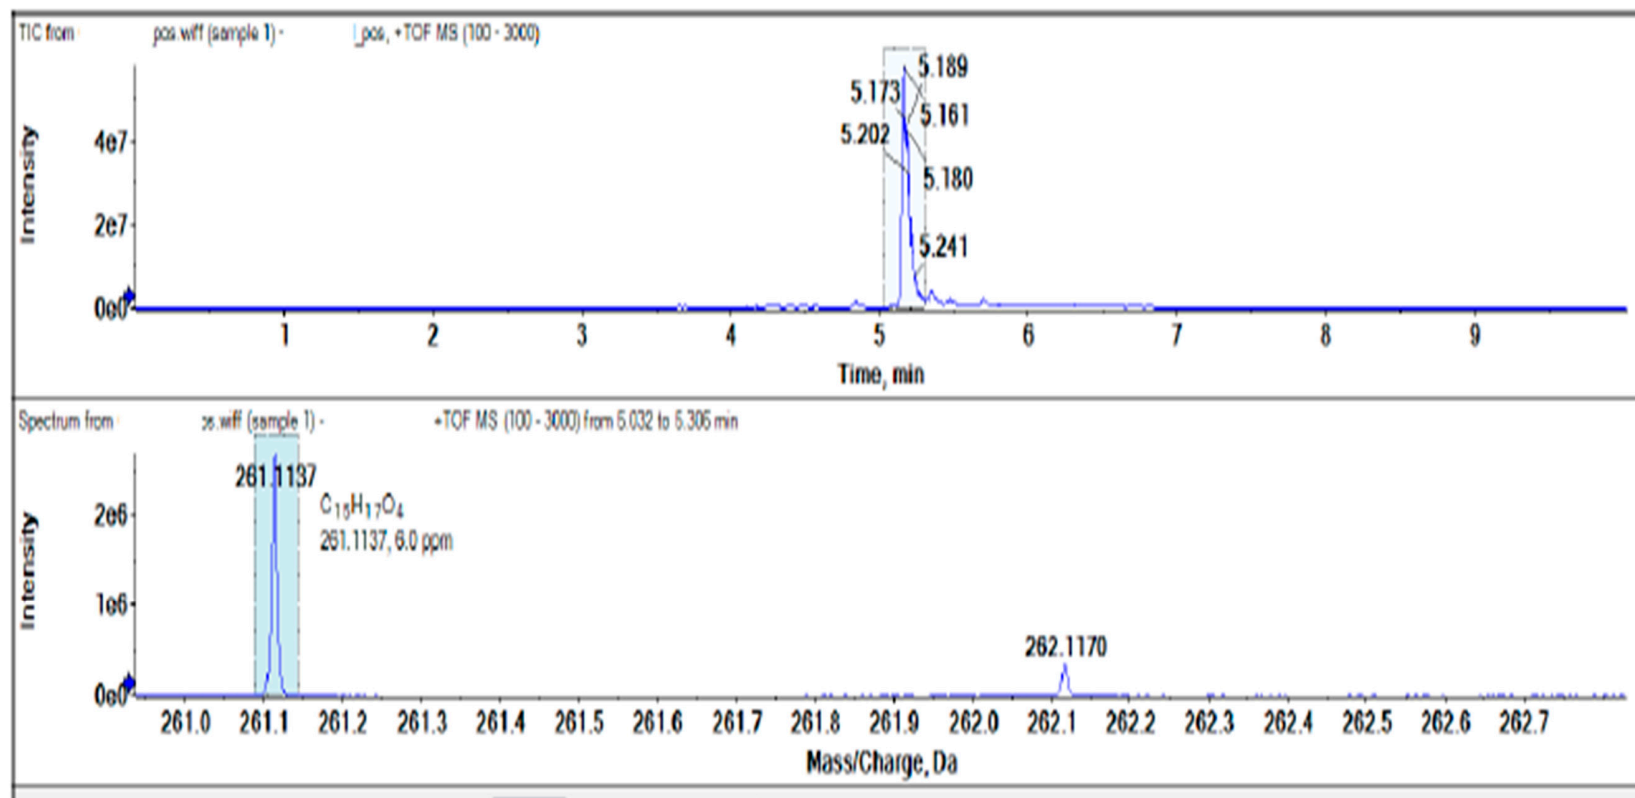

Page S17: Figure S16. HRESIMS spectrum of cichorin E (2).

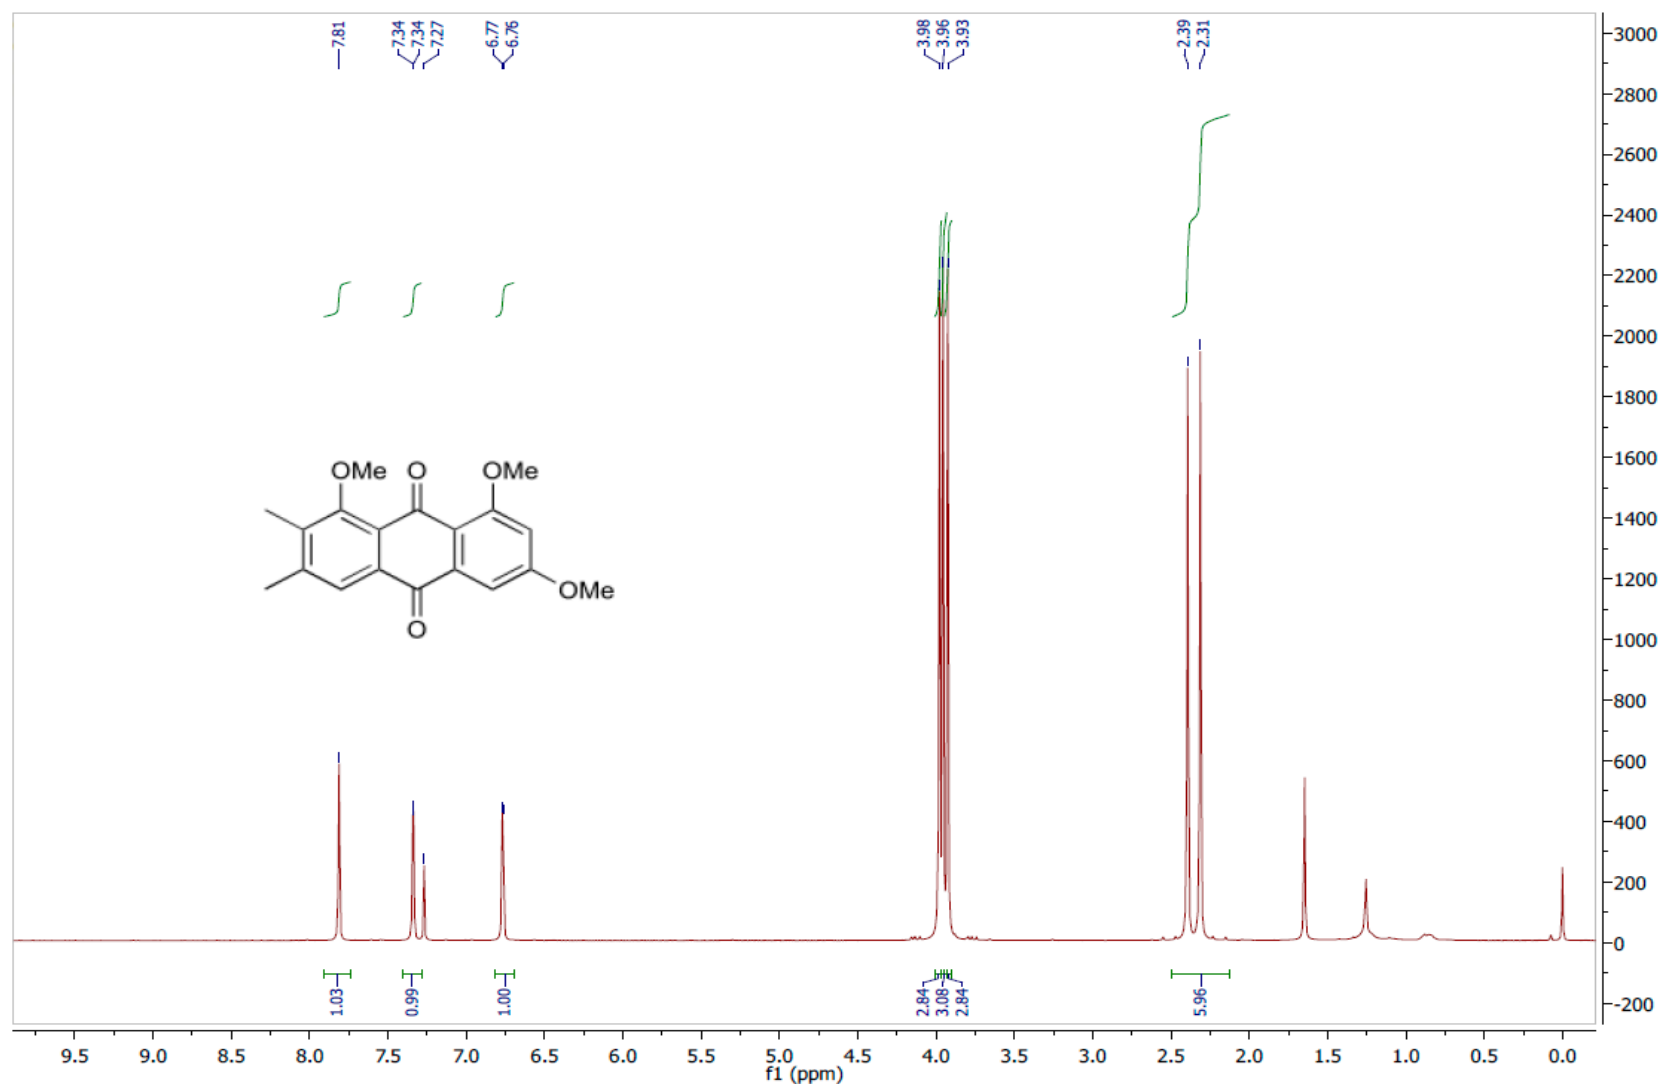

Page S18: Figure S17. <sup>1</sup>H NMR spectrum of cichorin F (3) (400 MHz, CDCl<sub>3</sub>).

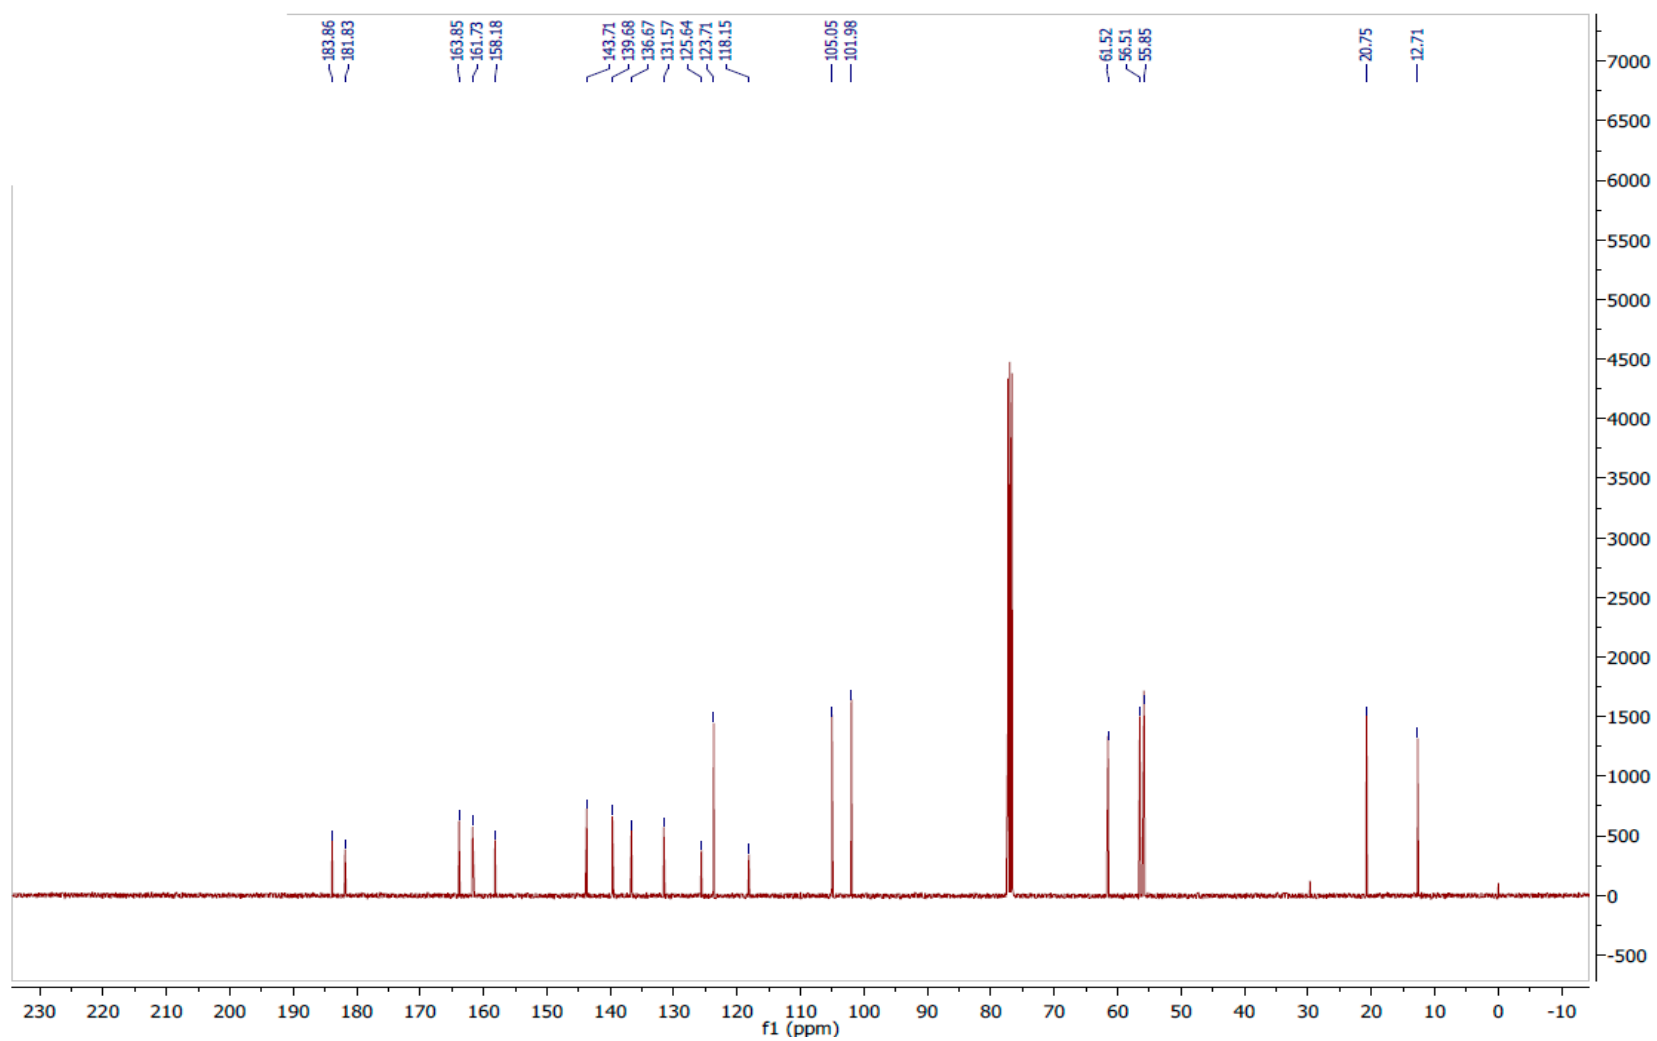

Page S19: Figure S18.  $^{13}\text{C}$  NMR spectrum of cichorin F (3) (400 MHz,  $\text{CDCl}_3$ ).

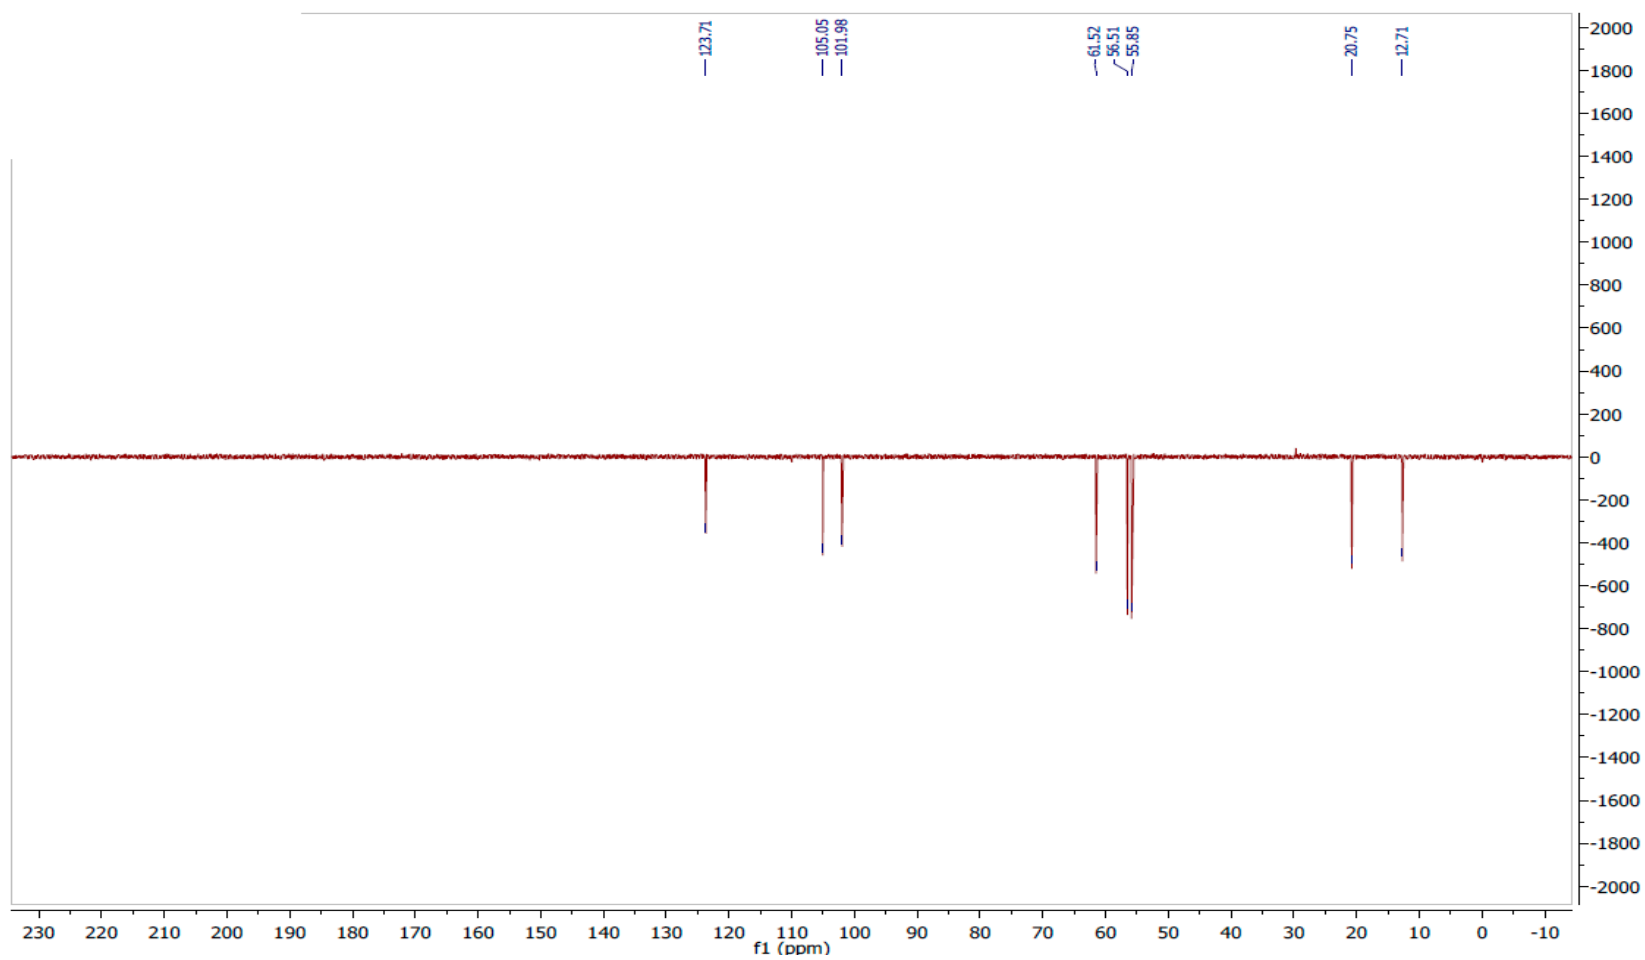

Page S20: Figure S19. DEPT spectrum of cichorin F (3) (400 MHz, CDCl<sub>3</sub>).

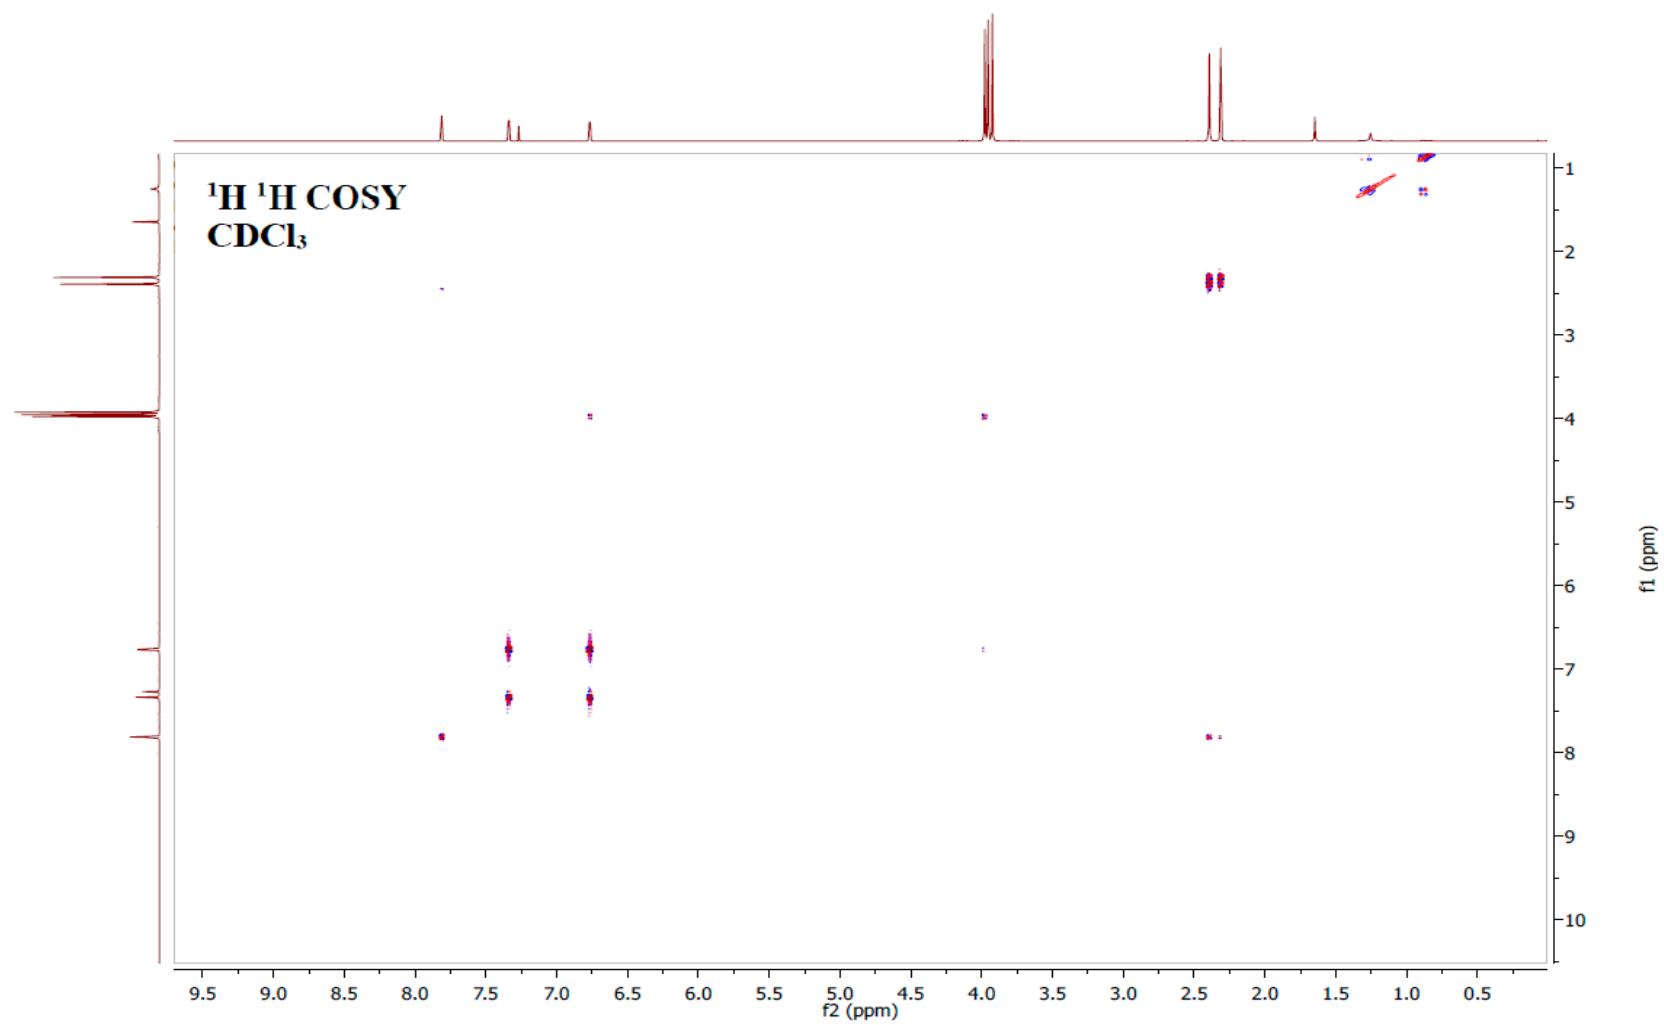

Page S21: Figure S20. COSY spectrum of cichorin F (**3**) (400 MHz, CDCl<sub>3</sub>).

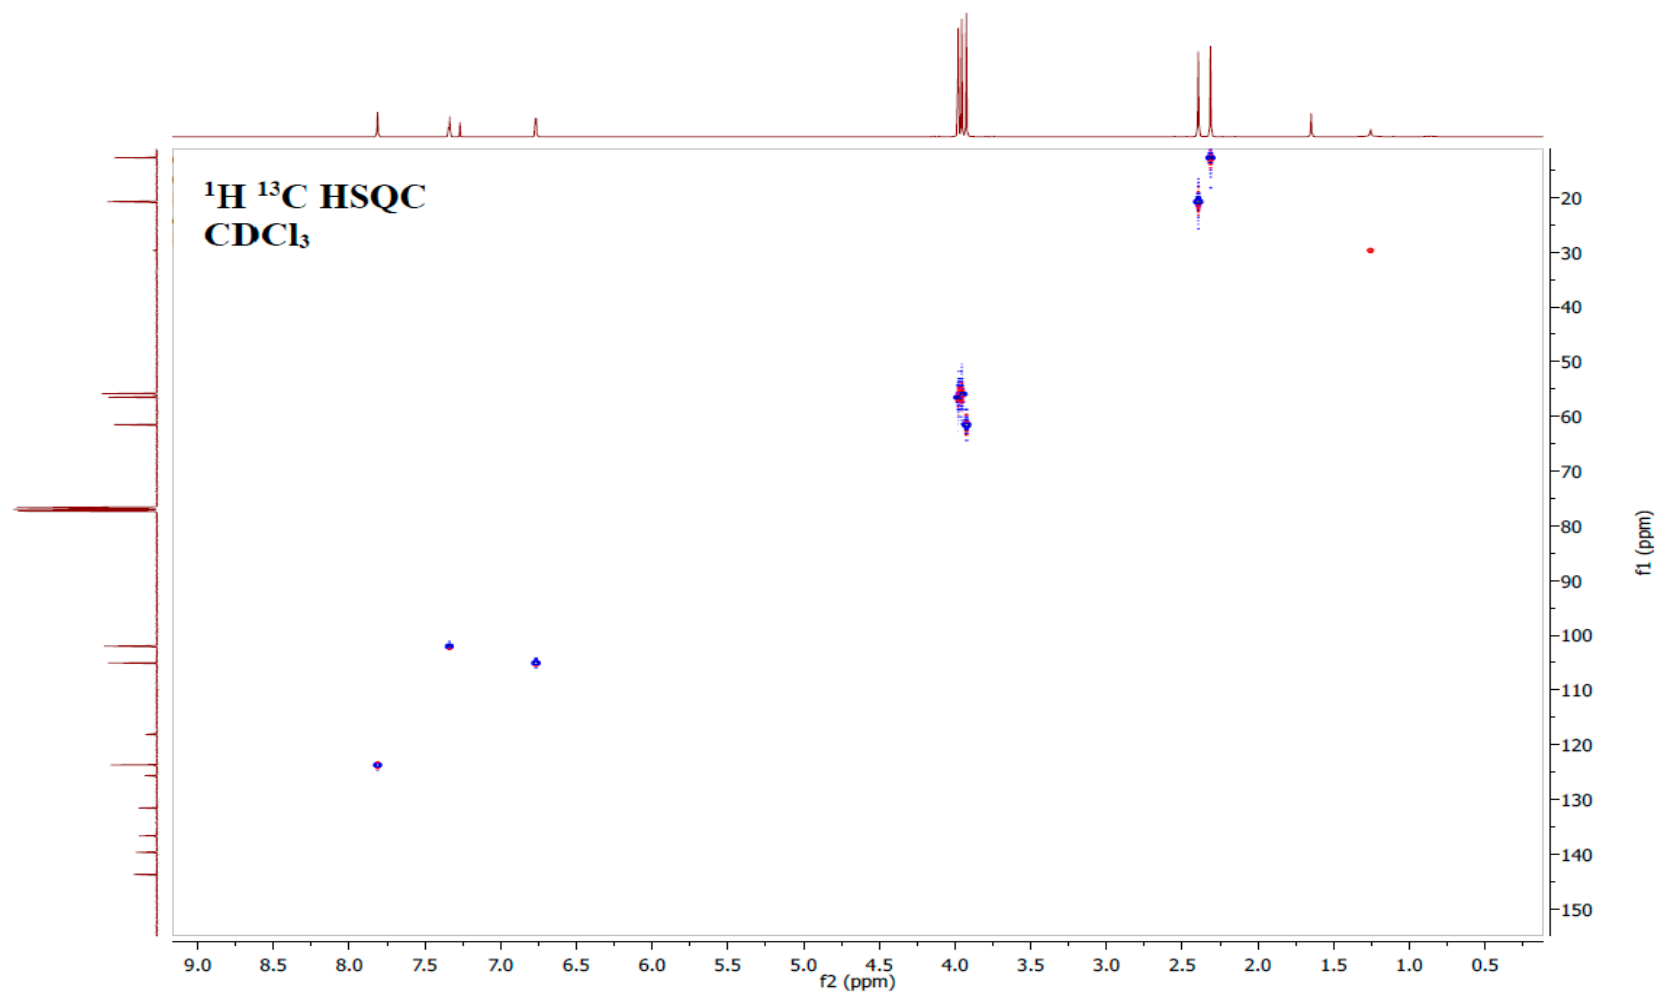

Page S22: Figure S21. HSQC spectrum of cichorin F (**3**) (400 MHz, CDCl<sub>3</sub>).

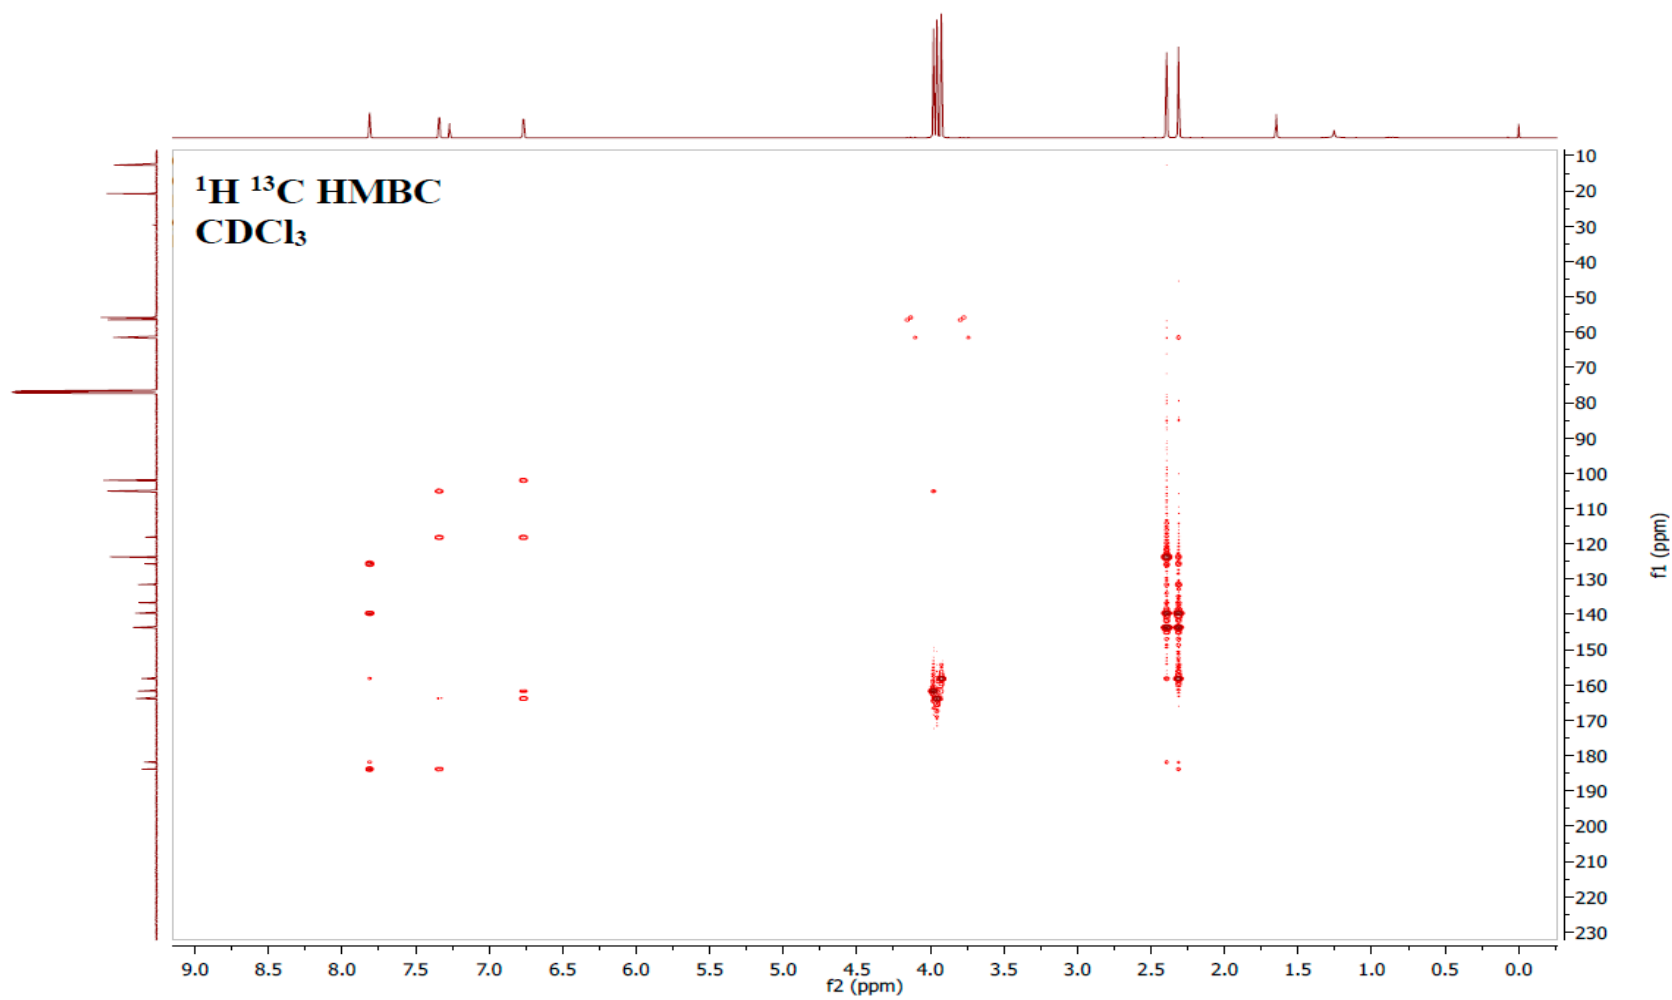

Page S23: Figure S22. HMBC spectrum of cichorin F (**3**) (400 MHz,  $\text{CDCl}_3$ ).

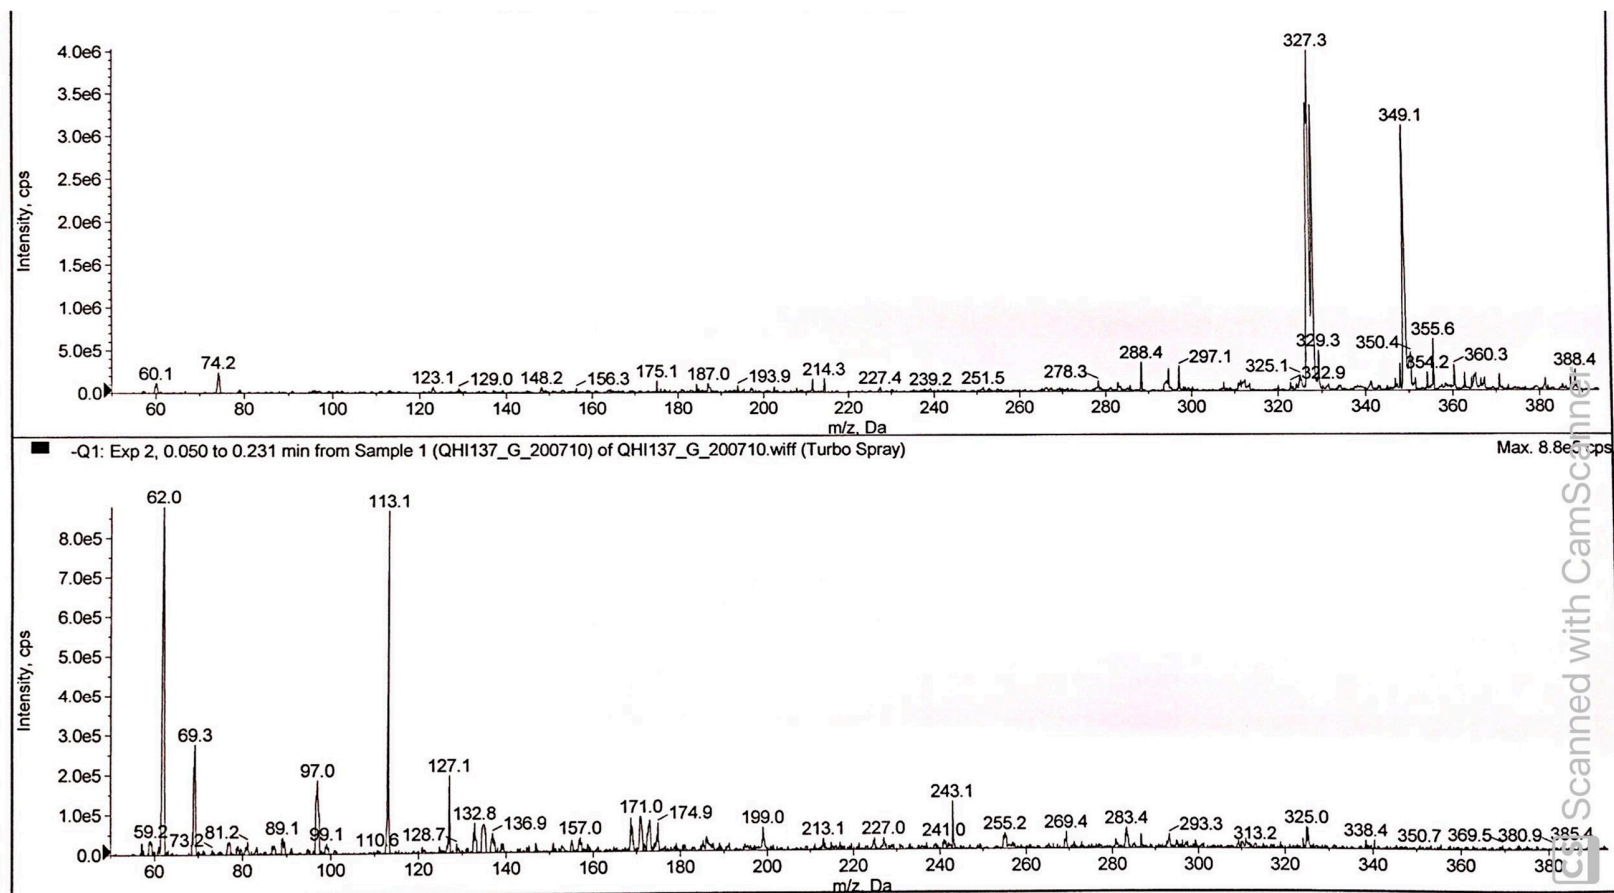

Page S24: Figure S23. HRESIMS spectrum of cichorin F (3).



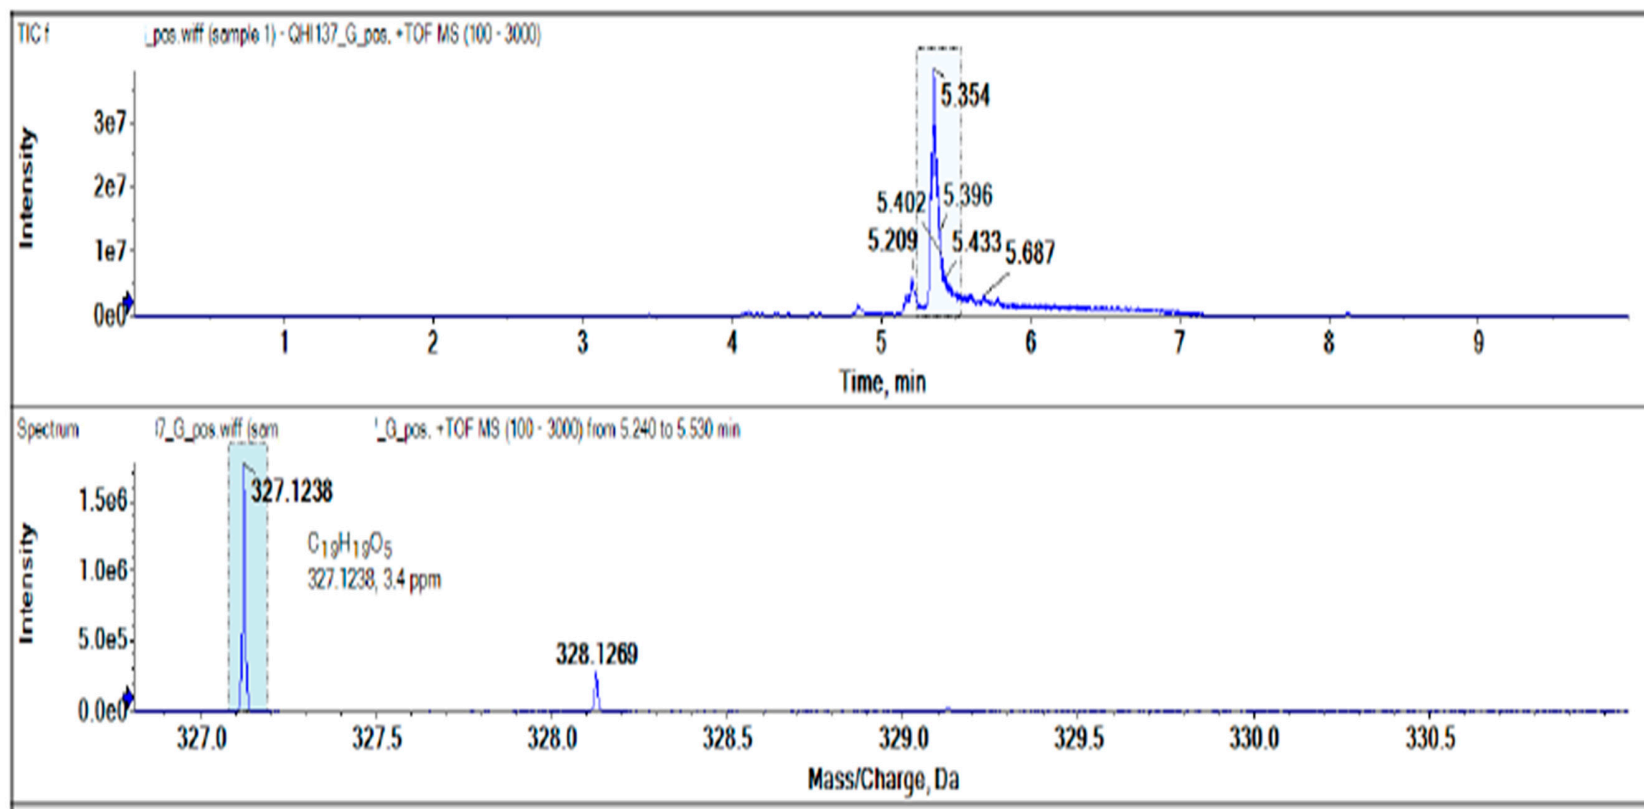

Page S25: Figure S24. HRESIMS spectrum of cichorin F (3).
